# Supplementary material for: Transmission networks of SARS-CoV-2 in Coastal Kenya during the first two waves: A retrospective genomic study
Source: eLife. 2022 Jun 14;11:e71703. doi: 10.7554/eLife.71703 (PMC9282859; doi:10.7554/eLife.71703)
Supplement: Figure 1—source data 1. [file elife-71703-fig1-data1.csv]

date	new_cases	new_cases_smoothed
2020-03-06
2020-03-07
2020-03-08
2020-03-09
2020-03-10
2020-03-11
2020-03-12
2020-03-13	1
2020-03-14	0
2020-03-15	2
2020-03-16	0
2020-03-17	0
2020-03-18	0	0.429
2020-03-19	4	1
2020-03-20	0	0.857
2020-03-21	0	0.857
2020-03-22	8	1.714
2020-03-23	1	1.857
2020-03-24	9	3.143
2020-03-25	3	3.571
2020-03-26	3	3.429
2020-03-27	0	3.429
2020-03-28	7	4.429
2020-03-29	4	3.857
2020-03-30	8	4.857
2020-03-31	9	4.857
2020-04-01	22	7.571
2020-04-02	29	11.286
2020-04-03	12	13
2020-04-04	4	12.571
2020-04-05	16	14.286
2020-04-06	16	15.429
2020-04-07	14	16.143
2020-04-08	7	14
2020-04-09	5	10.571
2020-04-10	5	9.571
2020-04-11	2	9.286
2020-04-12	6	7.857
2020-04-13	11	7.143
2020-04-14	8	6.286
2020-04-15	9	6.571
2020-04-16	9	7.143
2020-04-17	12	8.143
2020-04-18	16	10.143
2020-04-19	8	10.429
2020-04-20	11	10.429
2020-04-21	15	11.429
2020-04-22	7	11.143
2020-04-23	17	12.286
2020-04-24	16	12.857
2020-04-25	7	11.571
2020-04-26	12	12.143
2020-04-27	8	11.714
2020-04-28	11	11.143
2020-04-29	10	11.571
2020-04-30	12	10.857
2020-05-01	15	10.714
2020-05-02	24	13.143
2020-05-03	30	15.714
2020-05-04	25	18.143
2020-05-05	45	23
2020-05-06	47	28.286
2020-05-07	25	30.143
2020-05-08	14	30
2020-05-09	28	30.571
2020-05-10	23	29.571
2020-05-11	28	30
2020-05-12	15	25.714
2020-05-13	22	22.143
2020-05-14	21	21.571
2020-05-15	23	22.857
2020-05-16	49	25.857
2020-05-17	57	30.714
2020-05-18	25	30.286
2020-05-19	51	35.429
2020-05-20	66	41.714
2020-05-21	80	50.143
2020-05-22	52	54.286
2020-05-23	31	51.714
2020-05-24	22	46.714
2020-05-25	72	53.429
2020-05-26	62	55
2020-05-27	123	63.143
2020-05-28	147	72.714
2020-05-29	127	83.429
2020-05-30	143	99.429
2020-05-31	74	106.857
2020-06-01	59	105
2020-06-02	72	106.429
2020-06-03	123	106.429
2020-06-04	124	103.143
2020-06-05	134	104.143
2020-06-06	126	101.714
2020-06-07	167	115
2020-06-08	105	121.571
2020-06-09	117	128
2020-06-10	105	125.429
2020-06-11	121	125
2020-06-12	90	118.714
2020-06-13	152	122.429
2020-06-14	137	118.143
2020-06-15	133	122.143
2020-06-16	133	124.429
2020-06-17	184	135.714
2020-06-18	213	148.857
2020-06-19	117	152.714
2020-06-20	104	145.857
2020-06-21	260	163.429
2020-06-22	59	152.857
2020-06-23	155	156
2020-06-24	254	166
2020-06-25	178	161
2020-06-26	149	165.571
2020-06-27	278	190.429
2020-06-28	259	190.286
2020-06-29	120	199
2020-06-30	176	202
2020-07-01	307	209.571
2020-07-02	268	222.429
2020-07-03	247	236.429
2020-07-04	389	252.286
2020-07-05	309	259.429
2020-07-06	181	268.143
2020-07-07	183	269.143
2020-07-08	278	265
2020-07-09	447	290.571
2020-07-10	473	322.857
2020-07-11	278	307
2020-07-12	379	317
2020-07-13	189	318.143
2020-07-14	497	363
2020-07-15	461	389.143
2020-07-16	421	385.429
2020-07-17	389	373.429
2020-07-18	688	432
2020-07-19	603	464
2020-07-20	418	496.714
2020-07-21	397	482.429
2020-07-22	637	507.571
2020-07-23	796	561.143
2020-07-24	667	600.857
2020-07-25	375	556.143
2020-07-26	960	607.143
2020-07-27	372	600.571
2020-07-28	606	630.429
2020-07-29	544	617.143
2020-07-30	788	616
2020-07-31	723	624
2020-08-01	727	674.286
2020-08-02	690	635.714
2020-08-03	544	660.286
2020-08-04	605	660.143
2020-08-05	671	678.286
2020-08-06	538	642.571
2020-08-07	727	643.143
2020-08-08	699	639.143
2020-08-09	599	626.143
2020-08-10	492	618.714
2020-08-11	497	603.286
2020-08-12	679	604.429
2020-08-13	650	620.429
2020-08-14	580	599.429
2020-08-15	515	573.143
2020-08-16	271	526.286
2020-08-17	245	491
2020-08-18	271	458.714
2020-08-19	379	415.857
2020-08-20	426	383.857
2020-08-21	322	347
2020-08-22	355	324.143
2020-08-23	246	320.571
2020-08-24	193	313.143
2020-08-25	246	309.571
2020-08-26	213	285.857
2020-08-27	373	278.286
2020-08-28	241	266.714
2020-08-29	164	239.429
2020-08-30	263	241.857
2020-08-31	144	234.857
2020-09-01	114	216
2020-09-02	178	211
2020-09-03	212	188
2020-09-04	179	179.143
2020-09-05	136	175.143
2020-09-06	83	149.429
2020-09-07	102	143.429
2020-09-08	151	148.714
2020-09-09	104	138.143
2020-09-10	143	128.286
2020-09-11	190	129.857
2020-09-12	176	135.571
2020-09-13	188	150.571
2020-09-14	48	142.857
2020-09-15	96	135
2020-09-16	0	120.143
2020-09-17	275	139
2020-09-18	148	133
2020-09-19	105	122.857
2020-09-20	152	117.714
2020-09-21	98	124.857
2020-09-22	139	131
2020-09-23	130	149.571
2020-09-24	141	130.429
2020-09-25	218	140.429
2020-09-26	164	148.857
2020-09-27	244	162
2020-09-28	53	155.571
2020-09-29	210	165.714
2020-09-30	151	168.714
2020-10-01	184	174.857
2020-10-02	210	173.714
2020-10-03	261	187.571
2020-10-04	243	187.429
2020-10-05	22	183
2020-10-06	137	172.571
2020-10-07	321	196.857
2020-10-08	271	209.286
2020-10-09	442	242.429
2020-10-10	538	282
2020-10-11	388	302.714
2020-10-12	73	310
2020-10-13	318	335.857
2020-10-14	604	376.286
2020-10-15	602	423.571
2020-10-16	437	422.857
2020-10-17	616	434
2020-10-18	685	476.429
2020-10-19	195	493.857
2020-10-20	571	530
2020-10-21	497	514.714
2020-10-22	1068	581.286
2020-10-23	631	609
2020-10-24	947	656.286
2020-10-25	931	691.429
2020-10-26	276	703
2020-10-27	836	740.857
2020-10-28	1018	815.286
2020-10-29	761	771.429
2020-10-30	1185	850.571
2020-10-31	1395	914.571
2020-11-01	685	879.429
2020-11-02	724	943.429
2020-11-03	492	894.286
2020-11-04	1494	962.286
2020-11-05	1008	997.571
2020-11-06	1109	986.714
2020-11-07	1065	939.571
2020-11-08	719	944.429
2020-11-09	756	949
2020-11-10	1344	1070.714
2020-11-11	1216	1031
2020-11-12	919	1018.286
2020-11-13	1470	1069.857
2020-11-14	1080	1072
2020-11-15	972	1108.143
2020-11-16	559	1080
2020-11-17	925	1020.143
2020-11-18	957	983.143
2020-11-19	1459	1060.286
2020-11-20	1048	1000
2020-11-21	1211	1018.714
2020-11-22	968	1018.143
2020-11-23	413	997.286
2020-11-24	727	969
2020-11-25	810	948
2020-11-26	780	851
2020-11-27	1554	923.286
2020-11-28	949	885.857
2020-11-29	711	849.143
2020-11-30	302	833.286
2020-12-01	551	808.143
2020-12-02	961	829.714
2020-12-03	1253	897.286
2020-12-04	866	799
2020-12-05	735	768.429
2020-12-06	396	723.429
2020-12-07	199	708.714
2020-12-08	521	704.429
2020-12-09	561	647.286
2020-12-10	644	560.286
2020-12-11	673	532.714
2020-12-12	548	506
2020-12-13	366	501.714
2020-12-14	163	496.571
2020-12-15	404	479.857
2020-12-16	394	456
2020-12-17	552	442.857
2020-12-18	356	397.571
2020-12-19	390	375
2020-12-20	349	372.571
2020-12-21	114	365.571
2020-12-22	154	329.857
2020-12-23	427	334.571
2020-12-24	236	289.429
2020-12-25	282	278.857
2020-12-26	130	241.714
2020-12-27	80	203.286
2020-12-28	69	196.857
2020-12-29	147	195.857
2020-12-30	112	150.857
2020-12-31	207	146.714
2021-01-01	156	128.714
2021-01-02	64	119.286
2021-01-03	124	125.571
2021-01-04	106	130.857
2021-01-05	219	141.143
2021-01-06	271	163.857
2021-01-07	335	182.143
2021-01-08	221	191.429
2021-01-09	230	215.143
2021-01-10	87	209.857
2021-01-11	63	203.714
2021-01-12	98	186.429
2021-01-13	123	165.286
2021-01-14	138	137.143
2021-01-15	166	129.286
2021-01-16	223	128.286
2021-01-17	80	127.286
2021-01-18	65	127.571
2021-01-19	81	125.143
2021-01-20	136	127
2021-01-21	186	133.857
2021-01-22	139	130
2021-01-23	129	116.571
2021-01-24	85	117.286
2021-01-25	69	117.857
2021-01-26	141	126.429
2021-01-27	130	125.571
2021-01-28	99	113.143
2021-01-29	141	113.429
2021-01-30	112	111
2021-01-31	98	112.857
2021-02-01	83	114.857
2021-02-02	153	116.571
2021-02-03	150	119.429
2021-02-04	180	131
2021-02-05	195	138.714
2021-02-06	156	145
2021-02-07	129	149.429
2021-02-08	125	155.429
2021-02-09	104	148.429
2021-02-10	173	151.714
2021-02-11	132	144.857
2021-02-12	260	154.143
2021-02-13	179	157.429
2021-02-14	75	149.714
2021-02-15	147	152.857
2021-02-16	174	162.857
2021-02-17	144	158.714
2021-02-18	283	180.286
2021-02-19	226	175.429
2021-02-20	152	171.571
2021-02-21	208	190.571
2021-02-22	105	184.571
2021-02-23	194	187.429
2021-02-24	280	206.857
2021-02-25	277	206
2021-02-26	410	232.286
