# Supplementary material for: Transmission networks of SARS-CoV-2 in Coastal Kenya during the first two waves: A retrospective genomic study
Source: eLife. 2022 Jun 14;11:e71703. doi: 10.7554/eLife.71703 (PMC9282859; doi:10.7554/eLife.71703)
Supplement: Figure 1—source data 2. [file elife-71703-fig1-data2.csv]

date	Coast
12-Mar-20
13-Mar-20
14-Mar-20
15-Mar-20
16-Mar-20
17-Mar-20
18-Mar-20
19-Mar-20
20-Mar-20
21-Mar-20
22-Mar-20
23-Mar-20
24-Mar-20
25-Mar-20
26-Mar-20	0.396
27-Mar-20	0.33
28-Mar-20	0.396
29-Mar-20	0.396
30-Mar-20	0.495
31-Mar-20	0.462
01-Apr-20	0.528
02-Apr-20	0.297
03-Apr-20	0.363
04-Apr-20	0.396
05-Apr-20	0.429
06-Apr-20	0.33
07-Apr-20	0.429
08-Apr-20	0.363
09-Apr-20	0.462
10-Apr-20	0.396
11-Apr-20	0.297
12-Apr-20	0.429
13-Apr-20	0.528
14-Apr-20	0.66
15-Apr-20	0.891
16-Apr-20	0.957
17-Apr-20	1.353
18-Apr-20	1.518
19-Apr-20	1.353
20-Apr-20	1.353
21-Apr-20	1.287
22-Apr-20	1.188
23-Apr-20	1.287
24-Apr-20	1.122
25-Apr-20	0.957
26-Apr-20	1.122
27-Apr-20	1.617
28-Apr-20	1.782
29-Apr-20	2.013
30-Apr-20	2.805
01-May-20	2.607
02-May-20	2.706
03-May-20	2.871
04-May-20	2.64
05-May-20	2.64
06-May-20	2.508
07-May-20	1.683
08-May-20	2.046
09-May-20	2.112
10-May-20	1.782
11-May-20	2.574
12-May-20	2.607
13-May-20	2.376
14-May-20	3.102
15-May-20	3.597
16-May-20	3.894
17-May-20	3.894
18-May-20	3.069
19-May-20	3.069
20-May-20	3.861
21-May-20	3.696
22-May-20	4.191
23-May-20	4.356
24-May-20	5.279
25-May-20	5.807
26-May-20	6.005
27-May-20	5.477
28-May-20	5.84
29-May-20	5.84
30-May-20	7.622
31-May-20	8.546
01-Jun-20	9.239
02-Jun-20	10.691
03-Jun-20	11.714
04-Jun-20	11.252
05-Jun-20	10.592
06-Jun-20	9.338
07-Jun-20	8.876
08-Jun-20	7.853
09-Jun-20	8.084
10-Jun-20	7.754
11-Jun-20	7.721
12-Jun-20	8.15
13-Jun-20	7.721
14-Jun-20	7.622
15-Jun-20	8.975
16-Jun-20	7.523
17-Jun-20	6.863
18-Jun-20	7.457
19-Jun-20	6.566
20-Jun-20	6.632
21-Jun-20	6.665
22-Jun-20	6.302
23-Jun-20	6.137
24-Jun-20	6.599
25-Jun-20	6.599
26-Jun-20	7.259
27-Jun-20	7.655
28-Jun-20	7.16
29-Jun-20	6.236
30-Jun-20	6.005
01-Jul-20	5.675
02-Jul-20	4.817
03-Jul-20	4.356
04-Jul-20	4.85
05-Jul-20	4.092
06-Jul-20	4.191
07-Jul-20	3.861
08-Jul-20	4.389
09-Jul-20	4.356
10-Jul-20	4.521
11-Jul-20	3.366
12-Jul-20	4.125
13-Jul-20	4.521
14-Jul-20	4.652
15-Jul-20	4.125
16-Jul-20	4.323
17-Jul-20	3.828
18-Jul-20	4.422
19-Jul-20	3.696
20-Jul-20	4.257
21-Jul-20	4.587
22-Jul-20	4.422
23-Jul-20	4.323
24-Jul-20	5.147
25-Jul-20	5.939
26-Jul-20	6.434
27-Jul-20	4.817
28-Jul-20	4.652
29-Jul-20	4.85
30-Jul-20	4.751
31-Jul-20	4.059
01-Aug-20	2.442
02-Aug-20	2.211
03-Aug-20	3.168
04-Aug-20	2.97
05-Aug-20	3.399
06-Aug-20	3.762
07-Aug-20	3.729
08-Aug-20	4.356
09-Aug-20	4.389
10-Aug-20	3.795
11-Aug-20	4.751
12-Aug-20	4.619
13-Aug-20	4.191
14-Aug-20	4.652
15-Aug-20	4.191
16-Aug-20	5.378
17-Aug-20	5.18
18-Aug-20	4.587
19-Aug-20	4.916
20-Aug-20	5.444
21-Aug-20	5.18
22-Aug-20	5.807
23-Aug-20	5.015
24-Aug-20	5.708
25-Aug-20	5.807
26-Aug-20	5.543
27-Aug-20	4.784
28-Aug-20	5.741
29-Aug-20	5.081
30-Aug-20	5.345
31-Aug-20	4.455
01-Sep-20	4.224
02-Sep-20	3.597
03-Sep-20	4.158
04-Sep-20	3.366
05-Sep-20	3.498
06-Sep-20	3.366
07-Sep-20	5.081
08-Sep-20	5.411
09-Sep-20	5.609
10-Sep-20	5.708
11-Sep-20	5.939
12-Sep-20	6.896
13-Sep-20	6.401
14-Sep-20	5.477
15-Sep-20	5.576
16-Sep-20	5.477
17-Sep-20	5.345
18-Sep-20	4.982
19-Sep-20	4.356
20-Sep-20	4.422
21-Sep-20	4.026
22-Sep-20	3.234
23-Sep-20	3.663
24-Sep-20	3.432
25-Sep-20	3.828
26-Sep-20	3.729
27-Sep-20	4.059
28-Sep-20	4.158
29-Sep-20	4.125
30-Sep-20	3.795
01-Oct-20	4.718
02-Oct-20	6.005
03-Oct-20	7.358
04-Oct-20	8.744
05-Oct-20	9.965
06-Oct-20	10.988
07-Oct-20	11.747
08-Oct-20	13.397
09-Oct-20	14.221
10-Oct-20	13.199
11-Oct-20	12.803
12-Oct-20	14.419
13-Oct-20	13.727
14-Oct-20	15.211
15-Oct-20	14.122
16-Oct-20	14.782
17-Oct-20	17.917
18-Oct-20	17.389
19-Oct-20	17.224
20-Oct-20	20.59
21-Oct-20	20.029
22-Oct-20	23.592
23-Oct-20	22.999
24-Oct-20	22.966
25-Oct-20	28.212
26-Oct-20	32.798
27-Oct-20	30.126
28-Oct-20	31.215
29-Oct-20	34.514
30-Oct-20	35.207
31-Oct-20	38.705
01-Nov-20	39.926
02-Nov-20	35.075
03-Nov-20	37.286
04-Nov-20	40.949
05-Nov-20	44.611
06-Nov-20	47.68
07-Nov-20	50.946
08-Nov-20	50.748
09-Nov-20	56.457
10-Nov-20	56.061
11-Nov-20	52.398
12-Nov-20	41.542
13-Nov-20	38.639
14-Nov-20	31.38
15-Nov-20	28.872
16-Nov-20	26.199
17-Nov-20	25.077
18-Nov-20	23.163
19-Nov-20	25.242
20-Nov-20	25.209
21-Nov-20	32.798
22-Nov-20	31.413
23-Nov-20	28.938
24-Nov-20	27.717
25-Nov-20	29.829
26-Nov-20	30.687
27-Nov-20	36.494
28-Nov-20	29.268
29-Nov-20	29.532
30-Nov-20	26.826
01-Dec-20	27.288
02-Dec-20	27.981
03-Dec-20	27.783
04-Dec-20	22.273
05-Dec-20	21.613
06-Dec-20	23.559
07-Dec-20	23.361
08-Dec-20	22.471
09-Dec-20	24.417
10-Dec-20	24.516
11-Dec-20	24.252
12-Dec-20	24.219
13-Dec-20	20.524
14-Dec-20	20.491
15-Dec-20	20.623
16-Dec-20	15.343
17-Dec-20	14.419
18-Dec-20	12.242
19-Dec-20	10.427
20-Dec-20	8.876
21-Dec-20	8.546
22-Dec-20	8.678
23-Dec-20	8.975
24-Dec-20	5.51
25-Dec-20	4.389
26-Dec-20	3.597
27-Dec-20	3.135
28-Dec-20	3.399
29-Dec-20	3.168
30-Dec-20	3.366
31-Dec-20	4.125
01-Jan-21	4.026
02-Jan-21	3.993
03-Jan-21	5.477
04-Jan-21	5.444
05-Jan-21	5.444
06-Jan-21	4.784
07-Jan-21	4.191
08-Jan-21	4.158
09-Jan-21	3.696
10-Jan-21	2.64
11-Jan-21	2.343
12-Jan-21	2.31
13-Jan-21	1.815
14-Jan-21	1.65
15-Jan-21	2.277
16-Jan-21	2.574
17-Jan-21	2.376
18-Jan-21	2.277
19-Jan-21	2.31
20-Jan-21	3.036
21-Jan-21	3.993
22-Jan-21	3.3
23-Jan-21	3.366
24-Jan-21	3.267
25-Jan-21	3.267
26-Jan-21	3.366
27-Jan-21	3.135
28-Jan-21	2.475
29-Jan-21	2.409
30-Jan-21	1.98
31-Jan-21	2.211
01-Feb-21	2.211
02-Feb-21	2.277
03-Feb-21	1.749
04-Feb-21	1.749
05-Feb-21	1.749
06-Feb-21	1.98
07-Feb-21	1.749
08-Feb-21	1.749
09-Feb-21	1.65
10-Feb-21	2.079
11-Feb-21	2.277
12-Feb-21	2.607
13-Feb-21	2.442
14-Feb-21	2.508
15-Feb-21	3.003
16-Feb-21	2.97
17-Feb-21	2.904
18-Feb-21	2.673
19-Feb-21	2.409
20-Feb-21	3.366
21-Feb-21	3.503
22-Feb-21	3.418
23-Feb-21	4.042
24-Feb-21	4.466
25-Feb-21	5.774
26-Feb-21	8.777
