# Supplementary material for: Transmission networks of SARS-CoV-2 in Coastal Kenya during the first two waves: A retrospective genomic study
Source: eLife. 2022 Jun 14;11:e71703. doi: 10.7554/eLife.71703 (PMC9282859; doi:10.7554/eLife.71703)
Supplement: Figure 1—source data 3. [file elife-71703-fig1-data3.csv]

date	stringency_index
2020-03-06	13.89
2020-03-07	13.89
2020-03-08	13.89
2020-03-09	13.89
2020-03-10	13.89
2020-03-11	13.89
2020-03-12	13.89
2020-03-13	36.11
2020-03-14	36.11
2020-03-15	50.93
2020-03-16	50.93
2020-03-17	59.26
2020-03-18	59.26
2020-03-19	59.26
2020-03-20	68.52
2020-03-21	68.52
2020-03-22	68.52
2020-03-23	68.52
2020-03-24	72.22
2020-03-25	72.22
2020-03-26	72.22
2020-03-27	87.04
2020-03-28	87.04
2020-03-29	87.04
2020-03-30	87.04
2020-03-31	87.04
2020-04-01	87.04
2020-04-02	87.04
2020-04-03	87.04
2020-04-04	87.04
2020-04-05	87.04
2020-04-06	88.89
2020-04-07	88.89
2020-04-08	88.89
2020-04-09	88.89
2020-04-10	88.89
2020-04-11	88.89
2020-04-12	88.89
2020-04-13	88.89
2020-04-14	88.89
2020-04-15	88.89
2020-04-16	88.89
2020-04-17	88.89
2020-04-18	88.89
2020-04-19	88.89
2020-04-20	88.89
2020-04-21	88.89
2020-04-22	88.89
2020-04-23	88.89
2020-04-24	88.89
2020-04-25	88.89
2020-04-26	88.89
2020-04-27	88.89
2020-04-28	88.89
2020-04-29	88.89
2020-04-30	88.89
2020-05-01	88.89
2020-05-02	88.89
2020-05-03	88.89
2020-05-04	88.89
2020-05-05	88.89
2020-05-06	88.89
2020-05-07	88.89
2020-05-08	88.89
2020-05-09	88.89
2020-05-10	88.89
2020-05-11	88.89
2020-05-12	88.89
2020-05-13	88.89
2020-05-14	88.89
2020-05-15	88.89
2020-05-16	88.89
2020-05-17	88.89
2020-05-18	88.89
2020-05-19	88.89
2020-05-20	88.89
2020-05-21	88.89
2020-05-22	88.89
2020-05-23	88.89
2020-05-24	88.89
2020-05-25	88.89
2020-05-26	88.89
2020-05-27	88.89
2020-05-28	88.89
2020-05-29	88.89
2020-05-30	88.89
2020-05-31	88.89
2020-06-01	88.89
2020-06-02	88.89
2020-06-03	88.89
2020-06-04	88.89
2020-06-05	88.89
2020-06-06	86.11
2020-06-07	86.11
2020-06-08	86.11
2020-06-09	86.11
2020-06-10	86.11
2020-06-11	86.11
2020-06-12	86.11
2020-06-13	86.11
2020-06-14	86.11
2020-06-15	86.11
2020-06-16	86.11
2020-06-17	86.11
2020-06-18	86.11
2020-06-19	86.11
2020-06-20	86.11
2020-06-21	86.11
2020-06-22	86.11
2020-06-23	86.11
2020-06-24	86.11
2020-06-25	86.11
2020-06-26	86.11
2020-06-27	86.11
2020-06-28	86.11
2020-06-29	86.11
2020-06-30	86.11
2020-07-01	86.11
2020-07-02	86.11
2020-07-03	86.11
2020-07-04	86.11
2020-07-05	86.11
2020-07-06	86.11
2020-07-07	81.48
2020-07-08	81.48
2020-07-09	81.48
2020-07-10	81.48
2020-07-11	81.48
2020-07-12	81.48
2020-07-13	81.48
2020-07-14	81.48
2020-07-15	81.48
2020-07-16	81.48
2020-07-17	81.48
2020-07-18	81.48
2020-07-19	81.48
2020-07-20	81.48
2020-07-21	81.48
2020-07-22	81.48
2020-07-23	81.48
2020-07-24	81.48
2020-07-25	81.48
2020-07-26	81.48
2020-07-27	81.48
2020-07-28	81.48
2020-07-29	81.48
2020-07-30	81.48
2020-07-31	81.48
2020-08-01	75.93
2020-08-02	75.93
2020-08-03	75.93
2020-08-04	75.93
2020-08-05	75.93
2020-08-06	73.15
2020-08-07	73.15
2020-08-08	73.15
2020-08-09	73.15
2020-08-10	73.15
2020-08-11	73.15
2020-08-12	73.15
2020-08-13	70.37
2020-08-14	70.37
2020-08-15	70.37
2020-08-16	70.37
2020-08-17	70.37
2020-08-18	70.37
2020-08-19	70.37
2020-08-20	70.37
2020-08-21	70.37
2020-08-22	70.37
2020-08-23	70.37
2020-08-24	70.37
2020-08-25	70.37
2020-08-26	70.37
2020-08-27	70.37
2020-08-28	70.37
2020-08-29	70.37
2020-08-30	70.37
2020-08-31	70.37
2020-09-01	70.37
2020-09-02	70.37
2020-09-03	70.37
2020-09-04	70.37
2020-09-05	70.37
2020-09-06	70.37
2020-09-07	70.37
2020-09-08	70.37
2020-09-09	70.37
2020-09-10	70.37
2020-09-11	70.37
2020-09-12	70.37
2020-09-13	70.37
2020-09-14	70.37
2020-09-15	70.37
2020-09-16	70.37
2020-09-17	70.37
2020-09-18	70.37
2020-09-19	70.37
2020-09-20	70.37
2020-09-21	70.37
2020-09-22	70.37
2020-09-23	70.37
2020-09-24	70.37
2020-09-25	70.37
2020-09-26	70.37
2020-09-27	70.37
2020-09-28	70.37
2020-09-29	50
2020-09-30	50
2020-10-01	50
2020-10-02	50
2020-10-03	50
2020-10-04	50
2020-10-05	46.3
2020-10-06	46.3
2020-10-07	46.3
2020-10-08	46.3
2020-10-09	51.85
2020-10-10	51.85
2020-10-11	51.85
2020-10-12	51.85
2020-10-13	51.85
2020-10-14	51.85
2020-10-15	51.85
2020-10-16	51.85
2020-10-17	51.85
2020-10-18	51.85
2020-10-19	51.85
2020-10-20	51.85
2020-10-21	51.85
2020-10-22	51.85
2020-10-23	51.85
2020-10-24	51.85
2020-10-25	51.85
2020-10-26	51.85
2020-10-27	51.85
2020-10-28	51.85
2020-10-29	51.85
2020-10-30	51.85
2020-10-31	51.85
2020-11-01	46.3
2020-11-02	46.3
2020-11-03	46.3
2020-11-04	57.41
2020-11-05	57.41
2020-11-06	57.41
2020-11-07	57.41
2020-11-08	57.41
2020-11-09	57.41
2020-11-10	57.41
2020-11-11	57.41
2020-11-12	57.41
2020-11-13	57.41
2020-11-14	57.41
2020-11-15	57.41
2020-11-16	57.41
2020-11-17	57.41
2020-11-18	57.41
2020-11-19	57.41
2020-11-20	57.41
2020-11-21	57.41
2020-11-22	57.41
2020-11-23	57.41
2020-11-24	57.41
2020-11-25	57.41
2020-11-26	57.41
2020-11-27	57.41
2020-11-28	57.41
2020-11-29	57.41
2020-11-30	57.41
2020-12-01	62.96
2020-12-02	62.96
2020-12-03	62.96
2020-12-04	62.96
2020-12-05	62.96
2020-12-06	62.96
2020-12-07	62.96
2020-12-08	62.96
2020-12-09	62.96
2020-12-10	62.96
2020-12-11	62.96
2020-12-12	62.96
2020-12-13	62.96
2020-12-14	62.96
2020-12-15	62.96
2020-12-16	62.96
2020-12-17	62.96
2020-12-18	62.96
2020-12-19	62.96
2020-12-20	62.96
2020-12-21	62.96
2020-12-22	62.96
2020-12-23	62.96
2020-12-24	62.96
2020-12-25	62.96
2020-12-26	62.96
2020-12-27	62.96
2020-12-28	62.96
2020-12-29	62.96
2020-12-30	62.96
2020-12-31	62.96
2021-01-01	62.96
2021-01-02	62.96
2021-01-03	62.96
2021-01-04	59.26
2021-01-05	59.26
2021-01-06	59.26
2021-01-07	59.26
2021-01-08	59.26
2021-01-09	59.26
2021-01-10	59.26
2021-01-11	59.26
2021-01-12	59.26
2021-01-13	59.26
2021-01-14	59.26
2021-01-15	59.26
2021-01-16	59.26
2021-01-17	59.26
2021-01-18	59.26
2021-01-19	59.26
2021-01-20	59.26
2021-01-21	59.26
2021-01-22	59.26
2021-01-23	59.26
2021-01-24	59.26
2021-01-25	59.26
2021-01-26	50.93
2021-01-27	50.93
2021-01-28	50.93
2021-01-29	50.93
2021-01-30	50.93
2021-01-31	50.93
2021-02-01	50.93
2021-02-02	50.93
2021-02-03	50.93
2021-02-04	50.93
2021-02-05	50.93
2021-02-06	50.93
2021-02-07	50.93
2021-02-08	50.93
2021-02-09	50.93
2021-02-10	50.93
2021-02-11	50.93
2021-02-12	50.93
2021-02-13	50.93
2021-02-14	50.93
2021-02-15	50.93
2021-02-16	50.93
2021-02-17	50.93
2021-02-18	50.93
2021-02-19	50.93
2021-02-20	50.93
2021-02-21	50.93
2021-02-22	50.93
2021-02-23	50.93
2021-02-24	50.93
2021-02-25	50.93
2021-02-26	50.93
