# Supplementary material for: Transmission networks of SARS-CoV-2 in Coastal Kenya during the first two waves: A retrospective genomic study
Source: eLife. 2022 Jun 14;11:e71703. doi: 10.7554/eLife.71703 (PMC9282859; doi:10.7554/eLife.71703)
Supplement: Figure 2—source data 1. [file elife-71703-fig2-data1.csv]

date	Kwale	Kilifi	TanaRiver	Lamu	TaitaTaveta	Mombasa
12-Mar-20
13-Mar-20
14-Mar-20
15-Mar-20
16-Mar-20
17-Mar-20
18-Mar-20
19-Mar-20
20-Mar-20
21-Mar-20
22-Mar-20
23-Mar-20
24-Mar-20
25-Mar-20
26-Mar-20		0.344
27-Mar-20		0.138
28-Mar-20		0.138
29-Mar-20		0.138				1.821
30-Mar-20		0.275				2.152
31-Mar-20		0.344				2.483
01-Apr-20		0.275				2.317
02-Apr-20		0.138				1.324
03-Apr-20		0.115				1.379
04-Apr-20		0.115				1.517
05-Apr-20		0.115				1.655
06-Apr-20		0				1.379
07-Apr-20		0				1.537
08-Apr-20		0				1.3
09-Apr-20		0				1.655
10-Apr-20		0				1.655
11-Apr-20		0				1.49
12-Apr-20		0				2.152
13-Apr-20		0				2.648
14-Apr-20		0				3.31
15-Apr-20		0				4.469
16-Apr-20		0				4.8
17-Apr-20		0				5.655
18-Apr-20		0				5.438
19-Apr-20		0				5.655
20-Apr-20		0				5.655
21-Apr-20		0				5.241
22-Apr-20		0				4.828
23-Apr-20		0				5.241
24-Apr-20		0				4.552
25-Apr-20		0				4.634
26-Apr-20		0				4.552
27-Apr-20	0.192	0				6.621
28-Apr-20	0	0				7.448
29-Apr-20	0	0				8.414
30-Apr-20	0.192	0				11.586
01-May-20	0.192	0				10.759
02-May-20	0.165	0				9.576
03-May-20	0.165	0				10.167
04-May-20	0.165	0				9.34
05-May-20	0.165	0				9.34
06-May-20	0.165	0				8.867
07-May-20	0	0				6.03
08-May-20	0	0				7.33
09-May-20	0	0				7.567
10-May-20	0	0				7.448
11-May-20	0.192	0				10.621
12-May-20	0.769	0				9.931
13-May-20	0.923	0				10.759
14-May-20	0.923	0				14.4
15-May-20	2.307	0				15.724
16-May-20	3.461	0.138				16.055
17-May-20	3.461	0.138				16.055
18-May-20	3.461	0.138			3.522	11.752
19-May-20	2.769	0.138			1.761	12.745
20-May-20	3.845	0.115			1.468	12.828
21-May-20	3.845	0.229			1.468	12
22-May-20	2.692	0.344			0.978	14.897
23-May-20	1.73	0.229			0.489	16.552
24-May-20	1.978	0.197			0.419	17.143
25-May-20	2.142	0.295			0.419	18.798
26-May-20	2.142	0.393			1.258	19.153
27-May-20	0.824	0.393			1.258	18.207
28-May-20	0.824	0.491			1.258	19.389
29-May-20	0.824	0.393			2.097	19.271
30-May-20	0.824	0.59			3.774	24.946
31-May-20	0.33	0.59			3.774	28.611
01-Jun-20	0.165	0.491			3.355	31.448
02-Jun-20	0.33	0.688			2.516	36.532
03-Jun-20	0.494	1.081			2.516	39.606
04-Jun-20	1.318	1.179			3.774	36.887
05-Jun-20	1.318	1.376			2.935	34.522
06-Jun-20	1.318	1.277			1.258	30.621
07-Jun-20	1.318	1.277			1.677	28.847
08-Jun-20	1.154	1.376			1.677	25.182
09-Jun-20	0.989	1.769			1.677	25.655
10-Jun-20	0.824	1.572			1.677	24.828
11-Jun-20	0.165	1.277			0.839	25.773
12-Jun-20	0.165	1.081			2.097	27.192
13-Jun-20	0.165	0.983			2.097	25.773
14-Jun-20	0.165	1.474			2.097	24.828
15-Jun-20	2.637	1.474			2.097	27.901
16-Jun-20	2.637	1.081			2.097	23.172
17-Jun-20	2.637	0.884			2.097	21.044
18-Jun-20	2.472	1.081			2.097	23.054
19-Jun-20	2.472	1.081			1.258	20.099
20-Jun-20	2.472	1.179			2.516	19.862
21-Jun-20	2.637	0.688			2.516	20.453
22-Jun-20	0.33	1.081			2.516	20.099
23-Jun-20	0.33	0.983			2.516	19.626
24-Jun-20	0.33	1.277			2.516	20.926
25-Jun-20	0.33	1.179			2.097	21.163
26-Jun-20	0.33	1.179			1.677	23.645
27-Jun-20	0.33	1.081			0.419	25.419
28-Jun-20	0.165	1.277		2.978	0	23.645
29-Jun-20	0	0.884		0.993	0	21.163
30-Jun-20	0	0.688		3.97	0	20.217
01-Jul-20	0	0.393		3.97	0	19.389
02-Jul-20	0	0.295		3.97	3.355	15.488
03-Jul-20	0	0.295		3.97	3.355	13.833
04-Jul-20	0	0.59		5.956	4.193	14.778
05-Jul-20	0	0.393		5.956	4.193	12.296
06-Jul-20	0	0.295		11.911	4.193	12.059
07-Jul-20	0	0.295		8.934	4.193	11.232
08-Jul-20	0	0.393		8.934	4.193	13.005
09-Jul-20	0	0.983		12.904	1.258	12.532
10-Jul-20	0	0.983		16.874	1.258	12.65
11-Jul-20	0.165	0.983		13.897	0.839	8.867
12-Jul-20	0.165	1.474		13.897	0.839	10.759
13-Jul-20	0.33	2.457		8.934	0.839	11.468
14-Jul-20	0.33	2.457		8.934	0.839	11.941
15-Jul-20	0.33	2.358		9.926	0.839	10.049
16-Jul-20	0.33	1.867		5.956	0.419	11.941
17-Jul-20	0.33	1.867		1.985	0.419	10.64
18-Jul-20	0.165	2.162	0.904	3.97	0	12.414
19-Jul-20	0.165	1.671	0	3.97	0	10.64
20-Jul-20	0	0.688	0.452	2.978	0.839	13.714
21-Jul-20	0	1.179	0.452	2.978	1.258	14.187
22-Jul-20	0	1.179	0.452	2.978	1.258	13.596
23-Jul-20	0	1.081	0.452	2.978	1.258	13.36
24-Jul-20	0.165	1.277	0.452	3.97	1.258	15.842
25-Jul-20	0.659	0.786	1.356	3.97	2.097	18.443
26-Jul-20	0.824	0.884	1.356	3.97	2.097	19.98
27-Jul-20	0.989	0.884	0.904	3.97	1.258	14.424
28-Jul-20	1.154	0.491	0.904	3.97	0.839	14.305
29-Jul-20	1.154	0.688	0.904	2.978	2.097	14.542
30-Jul-20	1.154	0.884	2.261	2.978	2.516	13.478
31-Jul-20	1.154	0.688	2.261	1.985	2.516	11.35
01-Aug-20	0.659	0.59	1.356	0	1.677	6.739
02-Aug-20	0.494	0.491	1.356	0	2.516	5.911
03-Aug-20	0.33	0.786	1.356	0	2.516	9.103
04-Aug-20	0.165	0.884	1.356	0	2.516	8.394
05-Aug-20	0.165	1.179	1.356	2.978	1.258	9.576
06-Aug-20	0.165	1.179	1.809	2.978	1.258	10.759
07-Aug-20	0	1.179	1.809	2.978	1.258	10.759
08-Aug-20	0	1.474	1.809	12.904	1.258	11.468
09-Aug-20	0	1.474	1.809	17.867	0.419	11.232
10-Aug-20	0	1.277	1.809	20.845	1.677	8.631
11-Aug-20	0.165	3.341	1.809	20.845	1.677	9.458
12-Aug-20	0.165	3.144	3.165	28.786	2.935	7.567
13-Aug-20	0.165	3.144	1.356	28.786	2.935	6.502
14-Aug-20	0.165	3.538	1.356	29.778	2.935	7.567
15-Aug-20	0.165	3.243	1.356	19.852	4.193	7.094
16-Aug-20	0.33	3.341	1.809	29.778	6.29	9.222
17-Aug-20	0.33	3.341	1.809	26.801	5.032	9.222
18-Aug-20	0.165	1.277	1.809	30.771	5.032	9.222
19-Aug-20	0.659	1.474	0.904	29.778	6.709	9.695
20-Aug-20	0.824	1.572	1.356	31.764	6.29	11.113
21-Aug-20	0.824	1.179	1.356	30.771	9.225	9.931
22-Aug-20	0.824	1.572	1.356	35.734	12.161	10.286
23-Aug-20	0.659	1.965	0.904	24.815	14.677	7.803
24-Aug-20	0.659	1.965	3.165	27.793	18.87	8.158
25-Aug-20	0.659	1.867	3.165	23.823	18.87	9.103
26-Aug-20	0.165	1.376	2.713	13.897	19.29	10.286
27-Aug-20	0	1.081	2.261	11.911	19.29	8.394
28-Aug-20	0.165	1.671	2.261	17.867	19.709	10.167
29-Aug-20	0.165	1.376	2.261	12.904	19.709	8.749
30-Aug-20	0.165	1.572	2.261	8.934	15.096	11.232
31-Aug-20	0.165	1.474	0	5.956	10.903	10.286
01-Sep-20	0.165	1.572	0	5.956	12.58	8.867
02-Sep-20	0.165	1.769	0	5.956	10.064	7.094
03-Sep-20	0.33	1.769	0	6.948	10.903	8.631
04-Sep-20	0.165	1.965	0	0.993	7.967	7.212
05-Sep-20	0.165	1.965	0	0.993	3.774	8.867
06-Sep-20	0.989	1.376	0	0.993	3.774	8.512
07-Sep-20	0.989	1.867	0	1.985	5.451	13.478
08-Sep-20	0.989	1.867	0	1.985	3.774	15.133
09-Sep-20	0.989	2.064	0	1.985	3.355	15.724
10-Sep-20	0.824	2.162	0.452	0.993	2.935	16.197
11-Sep-20	0.824	1.572	0.452	3.97	2.516	17.498
12-Sep-20	0.989	1.474	0.452	3.97	4.613	20.335
13-Sep-20	0.165	1.376	0.452	3.97	6.29	18.798
14-Sep-20	0.165	0.884	0.452	2.978	5.032	16.552
15-Sep-20	0.33	0.884	0.452	2.978	5.871	16.552
16-Sep-20	0.33	0.491	0.452	2.978	5.451	16.788
17-Sep-20	0.33	0.884	0	2.978	5.032	16.079
18-Sep-20	0.33	0.688	0	0	5.032	15.369
19-Sep-20	0.165	0.786	0	0	5.032	13.123
20-Sep-20	0.165	1.081	0	0	3.774	13.36
21-Sep-20	0.165	1.081	0	0	3.355	12.059
22-Sep-20	0.165	0.884	0	0	2.516	9.695
23-Sep-20	0.33	1.474	0	0	2.516	10.404
24-Sep-20	0.33	1.179	0	0	2.516	9.931
25-Sep-20	0.989	1.179	0	0	2.516	10.877
26-Sep-20	0.989	1.867	0	0	0.839	10.167
27-Sep-20	0.989	2.653	0	0.993	0.419	10.404
28-Sep-20	0.989	2.751	0	0.993	0.419	10.64
29-Sep-20	0.824	2.751	0	0.993	0.419	10.64
30-Sep-20	0.659	2.162	0	0.993	0.419	10.286
01-Oct-20	0.659	2.751	0	1.985	0.419	12.768
02-Oct-20	0.33	3.243	0	1.985	0.419	17.025
03-Oct-20	0.659	3.636	0	1.985	1.677	20.808
04-Oct-20	1.154	5.601	0	0.993	1.677	23.172
05-Oct-20	1.483	5.503	0	0.993	1.677	27.429
06-Oct-20	1.483	7.272	0	0.993	2.516	28.729
07-Oct-20	1.483	7.861	0	0.993	2.516	30.739
08-Oct-20	1.483	7.173	0	0	3.355	37.36
09-Oct-20	1.154	11.202	0	0	3.355	35.704
10-Oct-20	0.824	12.873	0	0	1.677	30.739
11-Oct-20	0.33	9.827	0	0	1.677	33.34
12-Oct-20	0.33	11.595	0	0	5.451	35.941
13-Oct-20	0.33	9.827	0	0	4.613	35.823
14-Oct-20	0.494	9.728	0	0	4.613	41.143
15-Oct-20	0.494	10.22	0	0	3.774	36.887
16-Oct-20	0.494	9.04	0	0.993	4.193	40.434
17-Oct-20	0.659	11.301	0	0.993	4.193	48.828
18-Oct-20	0.659	11.497	0	0.993	4.193	46.7
19-Oct-20	0.494	9.827	0	0.993	0.419	49.301
20-Oct-20	3.626	11.89	0	0.993	0.839	56.512
21-Oct-20	3.461	11.497	0	0.993	0.839	55.094
22-Oct-20	4.12	14.838	0.904	0.993	1.677	62.897
23-Oct-20	4.944	14.445	0.904	0.993	1.677	60.65
24-Oct-20	4.944	10.121	0.904	0.993	2.097	65.616
25-Oct-20	5.603	13.954	0.904	0.993	4.613	78.621
26-Oct-20	6.757	15.526	2.713	0.993	6.29	91.389
27-Oct-20	4.12	14.249	3.165	0.993	5.871	85.241
28-Oct-20	6.263	15.231	3.165	0.993	6.709	86.187
29-Oct-20	5.933	16.214	3.165	3.97	20.548	92.808
30-Oct-20	5.274	15.624	3.165	2.978	20.548	96.591
31-Oct-20	6.263	17.59	3.165	2.978	20.548	106.049
01-Nov-20	8.075	17.098	3.165	5.956	18.032	110.069
02-Nov-20	6.922	15.821	1.356	5.956	16.354	96
03-Nov-20	6.427	16.017	1.356	9.926	16.774	103.448
04-Nov-20	9.559	18.867	1.356	9.926	16.774	110.897
05-Nov-20	9.394	20.144	4.974	6.948	23.902	120
06-Nov-20	11.536	25.058	4.974	13.897	28.934	121.301
07-Nov-20	10.712	34.491	8.591	22.83	31.451	119.527
08-Nov-20	8.405	37.243	8.591	19.852	31.87	117.399
09-Nov-20	9.229	50.508	8.591	19.852	32.709	121.064
10-Nov-20	9.559	53.555	8.591	15.882	32.709	116.217
11-Nov-20	4.45	52.376	8.591	23.823	31.87	107.468
12-Nov-20	4.615	46.873	4.069	23.823	11.742	81.931
13-Nov-20	2.637	40.191	4.069	16.874	7.129	83.113
14-Nov-20	3.791	28.988	1.356	7.941	9.225	70.936
15-Nov-20	4.285	26.532	2.261	10.919	10.064	63.724
16-Nov-20	3.626	21.52	2.261	10.919	9.225	60.887
17-Nov-20	3.296	18.081	1.809	10.919	8.806	61.478
18-Nov-20	4.12	16.607	1.809	2.978	8.806	56.749
19-Nov-20	6.922	16.803	3.165	4.963	7.129	61.833
20-Nov-20	7.251	17.786	4.069	4.963	10.064	59.232
21-Nov-20	6.427	31.838	3.165	20.845	9.645	68.571
22-Nov-20	5.768	29.48	4.974	21.838	14.677	64.906
23-Nov-20	6.263	21.913	4.974	22.83	15.096	64.552
24-Nov-20	6.263	21.422	5.426	22.83	15.096	60.65
25-Nov-20	6.098	23.977	5.426	38.712	18.032	62.542
26-Nov-20	4.12	31.248	4.069	36.727	20.128	58.286
27-Nov-20	4.45	39.994	3.165	53.601	24.741	65.261
28-Nov-20	3.791	27.22	8.139	40.697	23.902	55.685
29-Nov-20	4.12	27.809	6.33	36.727	22.225	57.103
30-Nov-20	3.296	26.826	6.33	35.734	21.806	49.419
01-Dec-20	3.461	27.416	5.878	35.734	21.806	50.365
02-Dec-20	2.802	32.722	10.852	19.852	19.29	48.236
03-Dec-20	4.779	25.746	11.756	30.771	17.612	53.438
04-Dec-20	4.45	16.41	11.756	22.83	24.322	44.217
05-Dec-20	4.779	20.144	6.782	24.815	22.225	38.778
06-Dec-20	4.615	32.329	7.687	24.815	18.032	32.158
07-Dec-20	4.944	32.624	7.687	24.815	18.87	30.621
08-Dec-20	4.779	31.936	7.687	24.815	18.87	28.374
09-Dec-20	5.439	33.607	2.713	25.808	18.451	34.167
10-Dec-20	5.768	34.393	1.809	15.882	31.451	31.094
11-Dec-20	5.768	35.474	2.261	31.764	25.16	28.611
12-Dec-20	5.603	31.543	3.617	36.727	24.322	32.631
13-Dec-20	5.439	18.769	1.809	36.727	24.322	35.35
14-Dec-20	5.109	18.376	1.809	36.727	23.483	36.177
15-Dec-20	5.109	18.474	1.809	36.727	23.902	36.414
16-Dec-20	4.285	9.63	1.809	35.734	23.902	28.847
17-Dec-20	2.967	9.04	1.809	39.705	12.58	29.911
18-Dec-20	2.307	7.075	1.356	14.889	4.613	30.266
19-Dec-20	2.307	6.191	0	4.963	3.774	26.601
20-Dec-20	2.802	4.913	0	4.963	3.774	22.227
21-Dec-20	2.802	5.11	0	9.926	3.774	20.217
22-Dec-20	2.802	5.503	0	9.926	3.355	20.335
23-Dec-20	3.131	3.734	0	9.926	3.355	23.291
24-Dec-20	1.154	2.751	0	5.79	1.468	17.793
25-Dec-20	1.73	2.866	0	5.79	1.468	12.552
26-Dec-20	1.73	1.49	0	5.79	1.468	10.897
27-Dec-20	1.154	1.376	0	5.79	1.957	9.379
28-Dec-20	1.154	1.146	0	9.264	2.935	10.069
29-Dec-20	1.154	0.688	0	9.264	2.935	9.655
30-Dec-20	1.538	0.688	0	9.264	5.382	9.517
31-Dec-20	1.483	1.769	0	8.934	4.613	9.222
01-Jan-21	0.989	1.769	0	8.934	4.193	9.34
02-Jan-21	0.824	1.965	0	13.897	4.193	8.512
03-Jan-21	0.824	2.85	0	13.897	18.451	8.749
04-Jan-21	1.154	3.341	0	5.956	18.032	8.867
05-Jan-21	1.154	3.538	0	5.956	18.032	8.631
06-Jan-21	0.989	3.341	0	5.956	15.935	7.212
07-Jan-21	0.824	2.358	0	4.963	15.935	6.502
08-Jan-21	0.824	2.26	0	5.956	16.354	6.266
09-Jan-21	0.824	2.162	0	0.993	17.193	5.084
10-Jan-21	0.989	1.769	0	0.993	2.516	5.793
11-Jan-21	1.154	1.376	0	0.993	2.097	5.202
12-Jan-21	1.154	1.081	0	0.993	2.097	5.438
13-Jan-21	0.659	1.081	0	0.993	2.097	4.02
14-Jan-21	0.769	1.032	0	1.158	2.446	4.276
15-Jan-21	1.923	1.032	0	0	2.935	6.069
16-Jan-21	2.5	1.032	0	0	2.446	7.034
17-Jan-21	2.307	0.803	0	0	1.957	6.759
18-Jan-21	1.73	0.688	0	0	1.957	6.897
19-Jan-21	1.923	0.688	0	0	1.957	6.897
20-Jan-21	3.269	1.605	0	0	4.892	7.034
21-Jan-21	2.802	1.572	0	0	11.742	7.094
22-Jan-21	1.813	2.064	0	0	10.484	5.084
23-Jan-21	1.318	3.341	0	2.978	10.064	3.901
24-Jan-21	1.318	3.341	0	2.978	10.064	3.547
25-Jan-21	1.318	3.341	0	2.978	10.064	3.547
26-Jan-21	1.154	3.538	0	2.978	10.064	3.783
27-Jan-21	0	2.85	0	2.978	8.806	4.966
28-Jan-21	0	2.85	0	2.978	2.097	4.493
29-Jan-21	0.165	2.358	0	2.978	3.774	4.256
30-Jan-21	0.165	1.179	0	0	3.774	4.493
31-Jan-21	0.494	1.081	0	0	4.193	5.084
01-Feb-21	0.494	1.179	0	0	4.193	4.966
02-Feb-21	0.989	1.277	0	0	4.193	4.729
03-Feb-21	0.989	1.179	0	0	3.355	3.192
04-Feb-21	0.989	1.179	0	0	2.516	3.429
05-Feb-21	0.824	1.277	0	0	3.355	3.192
06-Feb-21	1.318	1.277	0	0.993	3.355	3.547
07-Feb-21	0.989	1.179	0	0.993	2.935	3.192
08-Feb-21	0.989	1.081	0	0.993	2.935	3.31
09-Feb-21	0.494	0.884	0	0.993	2.935	3.547
10-Feb-21	0.494	1.277	0	0.993	2.935	4.611
11-Feb-21	0.494	1.179	0	0.993	2.935	5.438
12-Feb-21	0.989	1.376	0	0.993	1.258	6.502
13-Feb-21	0.824	1.376	0	0	1.258	6.148
14-Feb-21	0.824	1.179	0	0	2.516	6.266
15-Feb-21	1.154	1.277	0	0	2.516	7.685
16-Feb-21	1.318	1.179	0	0	2.516	7.567
17-Feb-21	1.318	1.376	0	0.993	2.516	6.975
18-Feb-21	1.483	1.277	0	0.993	2.935	6.03
19-Feb-21	0.989	0.884	0	0.993	2.516	6.03
20-Feb-21	0.989	1.081	0	0.993	4.613	8.631
21-Feb-21	1.154	1.261	0	1.158	3.914	8.966
22-Feb-21	0.923	1.376	0	1.39	4.697	8.441
23-Feb-21	0.865	1.72	0	1.737	5.871	9.931
24-Feb-21	1.154	0.917	0	0	6.849	12.138
25-Feb-21	1.154	1.376	0	0	8.806	15.724
26-Feb-21	2.307	2.751	0	0	14.677	22.345
