# Supplementary material for: Transmission networks of SARS-CoV-2 in Coastal Kenya during the first two waves: A retrospective genomic study
Source: eLife. 2022 Jun 14;11:e71703. doi: 10.7554/eLife.71703 (PMC9282859; doi:10.7554/eLife.71703)
Supplement: Figure 2—source data 2. [file elife-71703-fig2-data2.csv]

Month	Tests_done	Positive_tests
01/03/2020	94	7
01/04/2020	3265	133
01/05/2020	7572	444
01/06/2020	14560	954
01/07/2020	12434	448
01/08/2020	12589	419
01/09/2020	11127	555
01/10/2020	4656	632
01/11/2020	5887	1146
01/12/2020	4211	1156
01/01/2021	2925	317
01/02/2021	3396	116
