# Supplementary material for: Transmission networks of SARS-CoV-2 in Coastal Kenya during the first two waves: A retrospective genomic study
Source: eLife. 2022 Jun 14;11:e71703. doi: 10.7554/eLife.71703 (PMC9282859; doi:10.7554/eLife.71703)
Supplement: Figure 2—source data 3. [file elife-71703-fig2-data3.csv]

Month	Number of Genomes	Proportion sequenced
2020-03-01	4	57.1428571428571
2020-04-01	103	76.865671641791
2020-05-01	167	26.8488745980707
2020-06-01	64	7.89149198520345
2020-07-01	45	10.3926096997691
2020-08-01	78	17.7272727272727
2020-09-01	41	7.60667903525046
2020-10-01	184	22.0359281437126
2020-11-01	260	21.0696920583468
2020-12-01	94	10.917537746806
2021-01-01	76	24.9180327868852
2021-02-01	26	23.6363636363636
