# Supplementary material for: Transmission networks of SARS-CoV-2 in Coastal Kenya during the first two waves: A retrospective genomic study
Source: eLife. 2022 Jun 14;11:e71703. doi: 10.7554/eLife.71703 (PMC9282859; doi:10.7554/eLife.71703)
Supplement: Figure 2—source data 4. [file elife-71703-fig2-data4.csv]

County	Wave 1	Wave 2
Mombasa	305	164
Kilifi	32	264
Kwale	42	60
Taita Taveta	81	115
Tana River	7	9
Lamu	31	32
