# Supplementary material for: Transmission networks of SARS-CoV-2 in Coastal Kenya during the first two waves: A retrospective genomic study
Source: eLife. 2022 Jun 14;11:e71703. doi: 10.7554/eLife.71703 (PMC9282859; doi:10.7554/eLife.71703)
Supplement: Figure 2—source data 5. [file elife-71703-fig2-data5.csv]

County	case_count	no_sequenced
Mombasa	8450	367
Kilifi	2458	119
Kwale	436	68
Taita Taveta	855	139
Tana River	106	11
Lamu	350	43
