# Supplementary material for: Transmission networks of SARS-CoV-2 in Coastal Kenya during the first two waves: A retrospective genomic study
Source: eLife. 2022 Jun 14;11:e71703. doi: 10.7554/eLife.71703 (PMC9282859; doi:10.7554/eLife.71703)
Supplement: Figure 3—source data 1. [file elife-71703-fig3-data1.csv]

datecollection	Lineage	Mombasa	Kilifi	Kwale	Taita Taveta	Lamu	Tana River
2020-03-17	B.1	1	0	0	0	0	0
2020-03-21	B.1	1	0	0	0	0	0
2020-03-24	B.1	0	1	0	0	0	0
2020-03-25	B.1	0	1	0	0	0	0
2020-04-01	B.1.1	1	0	0	0	0	0
2020-04-03	B.1	2	0	0	0	0	0
2020-04-04	B.1	1	1	0	0	0	0
2020-04-04	A	2	0	0	0	0	0
2020-04-04	B.4	2	0	0	0	0	0
2020-04-04	B.4.7	1	0	0	0	0	0
2020-04-05	B.1	1	0	0	0	0	0
2020-04-05	B.1.1	1	0	0	0	0	0
2020-04-06	B.1	1	0	0	0	0	0
2020-04-06	B.1.1	1	0	0	0	0	0
2020-04-07	B.1.340	1	0	0	0	0	0
2020-04-08	B.1	1	0	0	0	0	0
2020-04-09	B.1	1	1	0	0	0	0
2020-04-09	B.1.222	1	0	0	0	0	0
2020-04-10	B.1	1	0	0	0	0	0
2020-04-10	A	1	0	0	0	0	0
2020-04-10	B.1.222	1	0	0	0	0	0
2020-04-10	B	1	0	0	0	0	0
2020-04-11	B.1	3	0	0	0	0	0
2020-04-13	B.1	2	0	0	0	0	0
2020-04-13	B.4	1	0	0	0	0	0
2020-04-13	B	2	0	0	0	0	0
2020-04-14	B.1	1	0	0	0	0	0
2020-04-14	B.1.1	2	0	0	0	0	0
2020-04-15	B.1	6	1	0	0	0	0
2020-04-15	B.1.1	1	0	0	0	0	0
2020-04-16	B.1	0	1	0	0	0	0
2020-04-17	B.1	2	0	0	0	0	0
2020-04-18	B.1	5	0	0	0	0	0
2020-04-19	B.1	5	0	0	0	0	0
2020-04-19	B	1	0	0	0	0	0
2020-04-20	B.1	7	0	0	0	0	0
2020-04-20	B.1.1	1	0	0	0	0	0
2020-04-20	B	1	0	0	0	0	0
2020-04-21	B.1	1	0	0	0	0	0
2020-04-22	B.1	3	0	0	0	0	0
2020-04-22	B	2	0	0	0	0	0
2020-04-23	B.1	2	0	0	0	0	0
2020-04-24	B.1	4	0	0	0	0	0
2020-04-25	B.1	4	0	1	0	0	0
2020-04-26	B.1	3	0	0	0	0	0
2020-04-27	B.1	4	0	0	0	0	0
2020-04-28	B.1	7	0	0	0	0	0
2020-04-28	B.1.535	1	0	0	0	0	0
2020-04-29	B.1	5	0	0	0	0	0
2020-04-30	B.1	1	0	0	0	0	0
2020-05-01	B.1	0	0	2	0	0	0
2020-05-04	B.1	6	0	0	0	0	0
2020-05-05	B.1	9	0	0	0	0	0
2020-05-06	B.1	9	0	0	0	0	0
2020-05-06	B.1.1	1	0	0	0	0	0
2020-05-07	B.1	11	0	0	0	0	0
2020-05-08	B.1	17	0	0	0	0	0
2020-05-09	B.1	10	0	0	0	0	0
2020-05-10	B.1	9	0	0	0	0	0
2020-05-11	B.1	8	0	0	0	0	0
2020-05-11	B.1.1.33	1	0	0	0	0	0
2020-05-11	B.1.549	0	0	0	1	0	0
2020-05-12	B.1	5	1	3	0	0	0
2020-05-12	A	0	0	3	0	0	0
2020-05-13	B.1	8	0	5	7	0	0
2020-05-13	B.1.1	1	0	0	3	0	0
2020-05-13	A	0	0	0	3	0	0
2020-05-13	B.1.1.1	0	0	2	0	0	0
2020-05-14	B.1	9	0	2	2	0	0
2020-05-14	B.1.1	0	0	0	1	0	0
2020-05-14	A	0	0	4	0	0	0
2020-05-15	B.1	6	0	0	0	0	0
2020-05-15	B.1.1	0	0	1	0	0	0
2020-05-15	A	0	0	2	1	0	0
2020-05-16	B.1	0	0	2	1	0	0
2020-05-16	B.1.1	0	0	1	1	0	0
2020-05-16	A	0	0	2	1	0	0
2020-05-17	B.1	0	1	2	0	0	0
2020-05-17	B.1.1	0	0	0	2	0	0
2020-05-28	B.1	0	1	0	0	0	0
2020-06-01	B.1	2	0	0	1	0	0
2020-06-02	B.1	1	0	0	0	0	0
2020-06-03	B.1	1	0	0	0	0	0
2020-06-03	A	0	0	1	0	0	0
2020-06-04	B.1	2	0	1	0	0	0
2020-06-04	B.1.1.1	0	1	0	0	0	0
2020-06-05	B.1	1	1	0	0	0	0
2020-06-05	B.1.1.111	0	0	1	0	0	0
2020-06-06	B.1	1	0	0	0	0	0
2020-06-07	B.1	0	0	0	1	0	0
2020-06-08	B.1	2	0	1	1	0	0
2020-06-09	B.1	1	0	0	0	0	0
2020-06-10	B.1	2	0	0	0	0	0
2020-06-11	B.1	2	0	0	1	0	0
2020-06-12	B.1	1	0	0	0	0	0
2020-06-13	B.1	1	0	0	0	0	0
2020-06-13	B.1.1	0	0	0	1	0	0
2020-06-13	A	0	0	1	0	0	0
2020-06-15	B.1	1	0	0	0	0	0
2020-06-15	B.1.1	0	0	0	1	0	0
2020-06-16	B.1	1	0	0	0	0	0
2020-06-18	B.1	2	0	0	1	0	0
2020-06-19	B.1	2	0	0	1	0	0
2020-06-19	B.1.1	0	1	0	0	0	0
2020-06-21	B.1	1	0	0	0	0	0
2020-06-22	B.1	1	0	0	0	0	0
2020-06-22	B.1.1.254	1	0	0	0	0	0
2020-06-23	B.1	2	0	0	1	0	0
2020-06-23	N.8	0	0	0	0	1	0
2020-06-24	B.1	3	0	0	0	0	0
2020-06-24	N.8	0	0	0	0	1	0
2020-06-25	B.1	2	0	0	0	0	0
2020-06-26	B.1.549	1	0	0	0	0	0
2020-06-27	B.1	2	2	0	0	0	0
2020-06-27	A	0	0	1	0	0	0
2020-06-27	B.1.177	0	1	0	0	0	0
2020-06-27	B.1.1.152	0	0	0	1	0	0
2020-06-28	B.1	1	0	0	0	0	0
2020-06-29	N.8	1	0	0	0	1	0
2020-06-30	B.1	1	0	0	0	0	0
2020-07-01	B.1	0	1	0	0	0	0
2020-07-01	N.8	0	0	0	0	2	0
2020-07-02	B.1	6	0	0	0	0	0
2020-07-02	N.8	0	0	0	0	1	0
2020-07-03	B.1	4	0	0	0	1	0
2020-07-03	N.8	0	0	0	0	1	0
2020-07-05	B.1	1	0	0	0	0	0
2020-07-06	N.8	0	0	0	0	1	0
2020-07-06	A.25	1	0	0	0	0	0
2020-07-07	N.8	0	0	0	0	4	0
2020-07-08	B.1	1	0	0	0	0	0
2020-07-09	B.1	2	0	0	0	0	0
2020-07-10	B.1	1	0	0	1	0	0
2020-07-10	N.8	0	0	0	0	1	0
2020-07-11	B.1	1	0	0	0	0	0
2020-07-11	B.1.549	1	0	0	0	0	0
2020-07-11	B.1.396	0	1	0	0	0	0
2020-07-13	N.8	0	0	0	0	1	0
2020-07-14	B.1	0	0	1	1	0	0
2020-07-16	N.8	0	0	0	0	1	0
2020-07-17	B.1	0	0	0	0	0	2
2020-07-17	B.1.549	0	1	0	0	0	0
2020-07-17	N.8	0	0	0	0	1	0
2020-07-27	N.8	0	0	0	0	1	0
2020-07-28	B.1	0	0	0	0	0	2
2020-07-31	B.1	0	1	0	1	0	0
2020-08-01	B.1	1	1	0	0	0	0
2020-08-01	B.1.558	1	0	0	0	0	0
2020-08-03	B.1	0	0	0	0	0	1
2020-08-03	B.1.549	0	1	0	0	0	0
2020-08-03	B.1.596	0	0	0	1	0	0
2020-08-08	B.1	1	0	0	0	0	0
2020-08-10	N.8	0	0	0	0	3	0
2020-08-11	B.1	0	0	0	1	0	0
2020-08-11	B.1.1	1	0	0	0	0	0
2020-08-11	B.1.549	0	0	0	1	0	0
2020-08-12	B.1	1	0	0	2	1	0
2020-08-12	N.8	0	0	0	0	1	0
2020-08-13	N.8	0	0	0	0	1	0
2020-08-13	A.25	1	0	0	0	0	0
2020-08-15	B.1	0	0	0	2	0	0
2020-08-15	N.8	0	0	0	0	1	0
2020-08-16	B.1	0	1	0	0	0	0
2020-08-17	B.1	0	2	0	0	0	0
2020-08-17	N.8	0	1	0	0	1	0
2020-08-18	B.1	1	0	0	0	0	0
2020-08-19	B.1	1	0	1	2	0	0
2020-08-19	N.8	0	0	0	0	1	0
2020-08-20	B.1	1	0	0	0	0	0
2020-08-20	B.1.549	0	0	1	0	0	0
2020-08-21	B.1	0	1	0	0	0	0
2020-08-21	B.1.1	0	0	0	1	0	0
2020-08-21	B.1.393	0	1	0	0	0	0
2020-08-22	B.1	1	0	0	0	0	0
2020-08-23	B.1	1	0	0	0	0	0
2020-08-24	B.1	1	0	0	2	1	0
2020-08-25	B.1	1	0	0	4	0	0
2020-08-26	B.1	0	0	0	3	1	0
2020-08-27	B.1	0	0	0	3	0	0
2020-08-27	A	1	0	0	0	0	0
2020-08-27	B.1.593	0	0	0	0	0	2
2020-08-28	B.1	1	0	0	1	0	0
2020-08-28	B.1.1	0	0	0	1	0	0
2020-08-30	B.1	0	1	0	5	0	0
2020-08-31	B.1	0	3	0	3	0	0
2020-08-31	N.8	1	0	0	0	1	0
2020-08-31	B.1.596	1	0	0	0	0	0
2020-09-01	B.1	0	1	0	3	0	0
2020-09-02	B.1	2	0	0	2	0	0
2020-09-03	B.1	1	0	0	2	0	0
2020-09-05	B.1.1	1	0	0	0	0	0
2020-09-06	B.1	0	0	0	1	0	0
2020-09-07	B.1	1	0	0	2	0	0
2020-09-07	N.8	0	0	0	0	1	0
2020-09-07	B.1.596	2	0	0	0	0	0
2020-09-08	B.1	1	0	0	0	0	0
2020-09-08	B.1.549	1	0	0	0	0	0
2020-09-10	B.1	1	0	0	1	0	0
2020-09-10	B	1	0	0	0	0	0
2020-09-11	B.1	0	0	1	0	0	0
2020-09-11	B.1.596	2	0	0	0	0	0
2020-09-11	B.1.393	0	0	0	1	0	0
2020-09-13	B.1	1	0	0	0	0	0
2020-09-13	B.1.549	1	0	0	0	0	0
2020-09-15	B.1	3	0	0	0	0	0
2020-09-15	B.1.549	1	0	0	0	0	0
2020-09-15	B.1.596	2	0	0	0	0	0
2020-09-15	B.1.530	0	0	0	1	0	0
2020-09-16	B.1	1	0	0	0	0	0
2020-09-17	B.1	0	0	0	1	0	0
2020-09-21	B.1	1	0	0	0	0	0
2020-09-24	B.1.596	0	0	1	0	0	0
2020-10-01	B.1.549	1	0	0	0	0	0
2020-10-05	B.1	0	0	1	0	0	0
2020-10-05	B.1.1	0	0	1	0	0	0
2020-10-05	B.1.596	0	0	1	0	0	0
2020-10-05	B.1.2	0	0	1	0	0	0
2020-10-05	B.1.1.464	0	0	1	0	0	0
2020-10-06	B.1	1	0	0	1	0	0
2020-10-06	B.1.596	1	0	0	0	0	0
2020-10-07	B.1.596	1	0	0	0	0	0
2020-10-08	B.1	2	0	0	0	0	0
2020-10-11	B.1	0	1	0	0	0	0
2020-10-11	B.1.530	0	1	0	0	0	0
2020-10-12	B.1	0	0	1	0	0	0
2020-10-13	B.1.1	1	0	0	0	0	0
2020-10-14	B.1	0	0	0	4	0	0
2020-10-14	B.1.549	1	0	0	0	0	0
2020-10-14	B.1.1.1	1	0	0	0	0	0
2020-10-14	B.1.596	1	0	0	0	0	0
2020-10-15	B.1	1	0	1	0	0	0
2020-10-15	B.1.1	14	0	0	0	0	0
2020-10-15	B.1.549	2	0	0	0	0	0
2020-10-15	B.1.1.254	1	0	0	0	0	0
2020-10-15	B.1.596.1	1	0	0	0	0	0
2020-10-19	B.1	0	1	1	4	0	0
2020-10-19	B.1.549	0	1	2	0	0	0
2020-10-21	B.1	0	1	0	0	0	0
2020-10-21	B.1.549	0	1	2	0	0	0
2020-10-21	B.1.530	0	0	1	0	0	0
2020-10-21	B.1.179	1	0	0	0	0	0
2020-10-21	B.1.212	0	1	0	0	0	0
2020-10-22	B.1	6	3	0	0	0	0
2020-10-22	B.1.1	3	0	0	0	0	0
2020-10-22	B.1.549	0	3	0	0	0	0
2020-10-22	B.1.596	1	0	0	0	0	0
2020-10-22	B.1.179	1	0	0	0	0	0
2020-10-23	B.1	0	8	0	0	0	0
2020-10-23	A	0	1	0	0	0	0
2020-10-23	B.1.549	0	1	0	0	0	0
2020-10-25	B.1.549	0	0	1	0	0	0
2020-10-25	B.1.179	1	0	0	0	0	0
2020-10-26	B.1	2	6	0	0	0	0
2020-10-26	B.1.549	2	3	0	0	0	0
2020-10-26	B.1.596.1	0	1	0	0	0	0
2020-10-27	B.1	8	3	2	0	0	0
2020-10-27	B.1.549	5	1	5	1	0	0
2020-10-27	B.1.596.1	0	2	0	0	0	0
2020-10-27	B.1.359	1	0	0	0	0	0
2020-10-28	B.1	3	4	2	2	0	0
2020-10-28	B.1.1	1	0	0	0	0	0
2020-10-28	B.1.549	5	2	1	0	0	0
2020-10-28	B.1.530	0	1	0	2	0	0
2020-10-28	A.23	1	0	0	0	0	0
2020-10-29	B.1	7	0	0	2	0	0
2020-10-29	B.1.1	1	0	0	0	0	0
2020-10-29	B.1.549	2	1	0	9	0	0
2020-10-29	B.1.596.1	1	0	0	0	0	0
2020-10-29	B.1.179	2	0	0	0	0	0
2020-10-29	B.1.137	0	0	0	0	0	1
2020-10-29	B.1.390	1	0	0	0	0	0
2020-10-30	B.1	0	1	0	0	0	0
2020-10-30	B.1.549	0	1	0	0	0	0
2020-10-31	B.1	0	0	0	0	1	0
2020-11-01	B.1.549	0	2	0	0	0	0
2020-11-01	B.1.530	0	0	0	1	0	0
2020-11-02	B.1	1	4	0	0	1	0
2020-11-02	B.1.549	0	2	0	0	0	0
2020-11-02	B.1.530	0	1	0	0	0	0
2020-11-03	B.1	0	1	1	1	0	0
2020-11-03	A	0	0	0	2	0	0
2020-11-03	B.1.549	2	1	0	0	0	0
2020-11-03	B.1.530	1	1	0	9	0	0
2020-11-03	B.1.596.1	0	1	1	0	0	0
2020-11-03	A.23	0	0	1	0	0	0
2020-11-03	B.1.391	1	0	0	0	0	0
2020-11-04	B.1	0	4	1	1	0	2
2020-11-04	B.1.549	0	0	0	9	0	0
2020-11-04	B.1.1.1	0	1	0	0	0	0
2020-11-04	B.1.530	0	0	0	2	0	0
2020-11-04	B.1.212	0	1	0	0	0	0
2020-11-05	B.1	1	3	0	1	3	0
2020-11-05	B.1.549	0	2	0	0	1	0
2020-11-06	B.1	3	1	0	0	1	0
2020-11-06	B.1.549	0	2	0	0	0	0
2020-11-06	B.1.530	0	0	1	0	0	0
2020-11-07	B.1	0	1	0	0	0	0
2020-11-08	B.1.530	0	0	0	1	0	0
2020-11-09	B.1	1	10	0	0	0	0
2020-11-09	B.1.549	2	1	2	0	0	0
2020-11-10	B.1	1	2	1	2	0	0
2020-11-10	B.1.549	1	0	1	1	0	0
2020-11-10	B.1.212	0	1	0	0	0	0
2020-11-10	B.1.143	1	0	0	0	0	0
2020-11-11	B.1	0	2	0	1	0	0
2020-11-11	B.1.549	2	2	1	0	0	0
2020-11-11	B.1.1.254	0	0	1	0	0	0
2020-11-11	B.1.596.1	0	1	0	0	0	0
2020-11-12	B.1	0	3	0	1	0	1
2020-11-12	B.1.549	0	1	0	0	0	0
2020-11-12	B.1.530	0	0	0	0	1	0
2020-11-13	B.1.549	1	0	1	0	0	0
2020-11-13	B.1.391	0	1	0	0	0	0
2020-11-14	B.1.530	0	0	0	1	0	0
2020-11-15	B.1	1	0	0	0	0	0
2020-11-15	B.1.549	2	0	0	0	0	0
2020-11-15	B.1.143	1	0	0	0	0	0
2020-11-15	B.1.480	0	0	0	1	0	0
2020-11-16	B.1	1	11	0	2	4	0
2020-11-16	A	0	0	0	1	0	0
2020-11-16	B.1.549	0	4	0	0	1	0
2020-11-16	B.1.530	0	0	0	1	0	0
2020-11-17	B.1	5	0	0	0	0	0
2020-11-17	B.1.549	0	6	0	0	1	0
2020-11-17	B.1.530	1	0	0	0	0	0
2020-11-17	B.1.279	1	0	0	0	0	0
2020-11-18	B.1	1	2	0	1	4	0
2020-11-18	B.1.549	1	0	0	0	1	0
2020-11-18	B.1.530	1	0	0	1	0	0
2020-11-19	B.1	2	1	0	1	0	0
2020-11-19	B.1.549	1	0	0	0	0	0
2020-11-19	B.1.530	0	0	0	1	0	0
2020-11-19	B.1.596.1	0	1	0	0	0	0
2020-11-20	B.1	2	2	0	0	0	0
2020-11-22	B.1	0	1	0	0	0	0
2020-11-22	B.1.530	1	0	0	0	0	0
2020-11-23	B.1	0	5	0	1	0	0
2020-11-23	B.1.549	0	1	0	0	0	0
2020-11-24	B.1	0	1	0	0	0	0
2020-11-24	B.1.530	0	2	0	0	0	0
2020-11-25	B.1	1	1	1	1	2	0
2020-11-25	B.1.549	0	1	0	0	0	0
2020-11-25	B.1.530	0	0	0	1	0	0
2020-11-25	B.1.596.1	0	1	0	0	0	0
2020-11-26	B.1	0	14	0	0	0	2
2020-11-26	B.1.1	0	5	0	0	0	0
2020-11-26	B.1.549	0	1	0	1	0	0
2020-11-26	B.1.596	0	1	0	0	0	0
2020-11-26	B.1.366	0	6	0	0	0	0
2020-11-27	B.1	2	1	0	1	0	1
2020-11-27	B.1.549	0	1	0	0	0	0
2020-11-27	B.1.450	0	2	0	0	0	0
2020-11-28	B.1	0	0	0	1	0	1
2020-11-30	B.1	0	2	1	0	0	0
2020-11-30	B.1.549	0	2	0	0	0	0
2020-11-30	B.1.530	0	0	0	1	0	0
2020-11-30	B.1.212	0	1	0	0	0	0
2020-12-01	B.1	1	3	0	0	0	0
2020-12-01	B.1.549	1	0	0	0	0	0
2020-12-02	B.1	1	1	0	0	1	0
2020-12-02	B.1.530	1	0	0	0	0	0
2020-12-03	B.1	5	13	1	0	1	0
2020-12-03	B.1.549	0	2	2	0	0	0
2020-12-03	B.1.530	0	1	0	0	0	0
2020-12-04	B.1	0	1	1	0	0	0
2020-12-04	B.1.549	0	1	0	0	0	0
2020-12-04	A.23	0	0	1	0	0	0
2020-12-05	B.1	0	2	0	0	0	0
2020-12-05	B.1.530	0	2	0	0	0	0
2020-12-07	B.1	0	1	0	0	0	0
2020-12-07	B.1.549	0	1	0	0	0	0
2020-12-07	N.8	0	0	0	0	1	0
2020-12-08	B.1	0	0	0	1	2	0
2020-12-08	B.1.549	0	0	1	0	0	0
2020-12-08	B.1.530	0	1	0	0	0	0
2020-12-09	B.1	2	1	0	1	2	0
2020-12-09	B.1.549	2	0	0	0	0	0
2020-12-09	B.1.530	0	0	0	1	0	0
2020-12-10	B.1	4	2	0	1	0	0
2020-12-10	B.1.549	0	3	0	0	0	0
2020-12-10	B.1.530	2	0	0	2	0	0
2020-12-10	B.1.596.1	0	1	0	0	0	0
2020-12-12	B.1	0	0	1	0	0	0
2020-12-14	B.1	0	1	0	1	0	1
2020-12-14	B.1.549	0	1	0	0	0	0
2020-12-15	B.1	0	1	0	0	0	0
2020-12-15	B.1.351	0	1	0	0	0	0
2020-12-16	B.1.549	0	1	0	0	0	0
2020-12-17	B.1	0	2	0	0	1	0
2020-12-17	B.1.530	1	0	0	0	0	0
2020-12-17	B.1.351	0	1	0	0	0	0
2020-12-18	A.23	0	1	0	0	0	0
2020-12-19	B.1	0	1	0	0	0	0
2020-12-21	B.1	1	0	0	0	0	0
2020-12-21	B.1.530	1	0	0	0	0	0
2020-12-28	B.1	0	2	0	0	0	0
2020-12-29	B.1	0	0	0	1	0	0
2021-01-02	A.23.1	1	0	0	0	0	0
2021-01-04	B.1.450	0	1	0	0	0	0
2021-01-06	B.1	0	0	0	2	0	0
2021-01-06	B.1.1	0	0	0	1	0	0
2021-01-06	B.1.530	0	0	0	8	0	0
2021-01-07	B.1.530	0	0	0	1	0	0
2021-01-14	B.1.1.7	1	0	0	0	0	0
2021-01-15	B.1	0	0	0	2	0	0
2021-01-15	B.1.530	0	2	0	0	0	0
2021-01-16	A.23.1	0	0	1	0	0	0
2021-01-18	B.1	0	0	0	1	0	0
2021-01-19	B.1.530	0	0	0	1	0	0
2021-01-19	B.1.351	0	0	1	0	0	0
2021-01-20	B.1	0	0	0	1	0	0
2021-01-20	B.1.530	0	0	0	1	0	0
2021-01-20	B.1.351	0	0	0	1	0	0
2021-01-21	B.1	0	0	3	2	1	0
2021-01-22	B.1.177	0	0	1	0	1	0
2021-01-22	B.1.351	0	0	1	0	0	0
2021-01-23	B.1	0	0	1	0	0	0
2021-01-24	B.1	2	4	0	0	0	0
2021-01-25	B.1	2	12	0	0	1	0
2021-01-25	B.1.530	0	0	0	1	0	0
2021-01-26	B.1	0	2	0	0	0	0
2021-01-27	B.1	0	4	0	0	0	0
2021-01-27	B	0	1	0	0	0	0
2021-01-28	B.1	0	5	0	1	0	0
2021-01-28	B.1.549	0	1	0	0	0	0
2021-01-28	B.1.351	0	1	0	1	0	0
2021-01-29	B.1	0	1	0	0	0	0
2021-01-29	B.1.351	0	0	1	0	0	0
2021-02-02	B.1.530	0	0	0	1	0	0
2021-02-03	A.23.1	0	0	0	1	0	0
2021-02-04	B.1.351	0	0	1	1	0	0
2021-02-05	B.1.351	0	0	2	2	0	0
2021-02-05	B.1.1.7	1	0	0	0	0	0
2021-02-06	A.23.1	0	0	0	1	0	0
2021-02-07	B.1.617.2	0	1	0	0	0	0
2021-02-08	AY.13	0	1	0	0	0	0
2021-02-13	B.1.351	1	0	0	0	0	0
2021-02-18	B.1.351	0	0	0	1	0	0
2021-02-19	B.1.351	0	0	0	1	0	0
2021-02-22	A.23.1	1	0	0	0	0	0
2021-02-23	B.1.351	1	0	0	0	0	0
2021-02-24	B.1.351	1	0	0	0	0	0
2021-02-25	B.1.351	2	0	1	0	0	0
2021-02-26	B.1.351	1	1	1	0	0	0
2021-02-26	A.23.1	0	1	0	0	0	0
2021-02-26	B.1.525	0	1	0	0	0	0
