# Supplementary material for: Transmission networks of SARS-CoV-2 in Coastal Kenya during the first two waves: A retrospective genomic study
Source: eLife. 2022 Jun 14;11:e71703. doi: 10.7554/eLife.71703 (PMC9282859; doi:10.7554/eLife.71703)
Supplement: Figure 3—source data 2. [file elife-71703-fig3-data2.csv]

Lineage	Wave one	Wave two	Lineage classification
B.1	369	327	International
B.1.1	25	27	International
A	23	4	International
B.4	3	0	International
B.4.7	1	0	International
B.1.340	1	0	International
B.1.222	2	0	International
B	8	1	International
B.1.535	1	0	International
B.1.1.33	1	0	International
B.1.549	10	130	Kenya specific
B.1.1.1	3	2	International
B.1.1.111	1	0	International
B.1.1.254	1	2	International
N.8	30	1	Kenya specific
B.1.177	1	2	International
B.1.1.152	1	0	International
A.25	2	0	International
B.1.396	1	0	International
B.1.558	1	0	International
B.1.596	8	7	International
B.1.393	2	0	International
B.1.593	2	0	International
B.1.530	1	61	Kenya specific
B.1.2	0	1	International
B.1.1.464	0	1	International
B.1.596.1	0	11	Kenya specific
B.1.179	0	5	International
B.1.212	0	4	International
B.1.359	0	1	International
A.23	0	4	International
B.1.137	0	1	International
B.1.390	0	1	International
B.1.391	0	2	International
B.1.143	0	2	International
B.1.480	0	1	International
B.1.279	0	1	International
B.1.366	0	6	International
B.1.450	0	3	International
B.1.351	0	25	International
A.23.1	0	6	International
B.1.1.7	0	2	International
B.1.617.2	0	1	International
AY.13	0	1	International
B.1.525	0	1	International
