# Supplementary material for: Transmission networks of SARS-CoV-2 in Coastal Kenya during the first two waves: A retrospective genomic study
Source: eLife. 2022 Jun 14;11:e71703. doi: 10.7554/eLife.71703 (PMC9282859; doi:10.7554/eLife.71703)
Supplement: Figure 3—source data 3. [file elife-71703-fig3-data3.csv]

month	key_lineages	Mombasa	Kilifi	Kwale	Taita Taveta	Lamu	Tana River
1-Mar-2020	B.1	2	2	0	0	0	0
1-Apr-2020	A	3	0	0	0	0	0
1-Apr-2020	B	7	0	0	0	0	0
1-Apr-2020	B.1	73	4	1	0	0	0
1-Apr-2020	B.1.1	7	0	0	0	0	0
1-Apr-2020	OtherCoastalKenya	8	0	0	0	0	0
1-May-2020	A	0	0	11	5	0	0
1-May-2020	B.1	107	3	16	10	0	0
1-May-2020	B.1.1	2	0	2	7	0	0
1-May-2020	B.1.1.1	0	0	2	0	0	0
1-May-2020	B.1.549	0	0	0	1	0	0
1-May-2020	OtherCoastalKenya	1	0	0	0	0	0
1-Jun-2020	A	0	0	3	0	0	0
1-Jun-2020	B.1	36	3	2	7	0	0
1-Jun-2020	B.1.1	0	1	0	2	0	0
1-Jun-2020	B.1.1.1	0	1	0	0	0	0
1-Jun-2020	B.1.549	1	0	0	0	0	0
1-Jun-2020	N.8	1	0	0	0	3	0
1-Jun-2020	OtherCoastalKenya	1	1	1	1	0	0
1-Jul-2020	B.1	16	2	1	3	1	4
1-Jul-2020	B.1.549	1	1	0	0	0	0
1-Jul-2020	N.8	0	0	0	0	14	0
1-Jul-2020	OtherCoastalKenya	1	1	0	0	0	0
1-Aug-2020	A	1	0	0	0	0	0
1-Aug-2020	B.1	11	9	1	28	3	1
1-Aug-2020	B.1.1	1	0	0	2	0	0
1-Aug-2020	B.1.549	0	1	1	1	0	0
1-Aug-2020	B.1.596	1	0	0	1	0	0
1-Aug-2020	N.8	1	1	0	0	9	0
1-Aug-2020	OtherCoastalKenya	2	1	0	0	0	2
1-Sep-2020	B	1	0	0	0	0	0
1-Sep-2020	B.1	12	1	1	12	0	0
1-Sep-2020	B.1.1	1	0	0	0	0	0
1-Sep-2020	B.1.530	0	0	0	1	0	0
1-Sep-2020	B.1.549	3	0	0	0	0	0
1-Sep-2020	B.1.596	6	0	1	0	0	0
1-Sep-2020	N.8	0	0	0	0	1	0
1-Sep-2020	OtherCoastalKenya	0	0	0	1	0	0
1-Oct-2020	A	0	1	0	0	0	0
1-Oct-2020	A.23	1	0	0	0	0	0
1-Oct-2020	B.1	30	28	8	13	1	0
1-Oct-2020	B.1.1	20	0	1	0	0	0
1-Oct-2020	B.1.1.1	1	0	0	0	0	0
1-Oct-2020	B.1.179	5	0	0	0	0	0
1-Oct-2020	B.1.212	0	1	0	0	0	0
1-Oct-2020	B.1.530	0	2	1	2	0	0
1-Oct-2020	B.1.549	18	14	11	10	0	0
1-Oct-2020	B.1.596	4	0	1	0	0	0
1-Oct-2020	B.1.596.1	2	3	0	0	0	0
1-Oct-2020	OtherCoastalKenya	3	0	2	0	0	1
1-Nov-2020	A	0	0	0	3	0	0
1-Nov-2020	A.23	0	0	1	0	0	0
1-Nov-2020	B.1	22	72	5	15	15	7
1-Nov-2020	B.1.1	0	5	0	0	0	0
1-Nov-2020	B.1.1.1	0	1	0	0	0	0
1-Nov-2020	B.1.212	0	3	0	0	0	0
1-Nov-2020	B.1.366	0	6	0	0	0	0
1-Nov-2020	B.1.530	4	4	1	19	1	0
1-Nov-2020	B.1.549	12	29	5	11	4	0
1-Nov-2020	B.1.596	0	1	0	0	0	0
1-Nov-2020	B.1.596.1	0	4	1	0	0	0
1-Nov-2020	OtherCoastalKenya	4	3	1	1	0	0
1-Dec-2020	A.23	0	1	1	0	0	0
1-Dec-2020	B.1	14	31	3	5	7	1
1-Dec-2020	B.1.351	0	2	0	0	0	0
1-Dec-2020	B.1.530	5	4	0	3	0	0
1-Dec-2020	B.1.549	3	9	3	0	0	0
1-Dec-2020	B.1.596.1	0	1	0	0	0	0
1-Dec-2020	N.8	0	0	0	0	1	0
1-Jan-2021	A.23.1	1	0	1	0	0	0
1-Jan-2021	B	0	1	0	0	0	0
1-Jan-2021	B.1	4	28	4	9	2	0
1-Jan-2021	B.1.1	0	0	0	1	0	0
1-Jan-2021	B.1.1.7	1	0	0	0	0	0
1-Jan-2021	B.1.351	0	1	3	2	0	0
1-Jan-2021	B.1.530	0	2	0	12	0	0
1-Jan-2021	B.1.549	0	1	0	0	0	0
1-Jan-2021	OtherCoastalKenya	0	1	1	0	1	0
1-Feb-2021	A.23.1	1	1	0	2	0	0
1-Feb-2021	B.1.1.7	1	0	0	0	0	0
1-Feb-2021	B.1.351	6	1	5	5	0	0
1-Feb-2021	B.1.525	0	1	0	0	0	0
1-Feb-2021	B.1.530	0	0	0	1	0	0
1-Feb-2021	OtherCoastalKenya	0	2	0	0	0	0
