# Supplementary material for: Transmission networks of SARS-CoV-2 in Coastal Kenya during the first two waves: A retrospective genomic study
Source: eLife. 2022 Jun 14;11:e71703. doi: 10.7554/eLife.71703 (PMC9282859; doi:10.7554/eLife.71703)
Supplement: Figure 4—source data 1. [file elife-71703-fig4-data1.csv]

Month	total_by_month	new_for_month	cummulative_types
3/1/20	1	1	1
4/1/20	9	8	9
5/1/20	6	3	12
6/1/20	10	5	17
7/1/20	5	2	19
8/1/20	10	4	23
9/1/20	8	1	24
10/1/20	17	9	33
11/1/20	17	6	39
12/1/20	7	1	40
1/1/21	10	2	42
2/1/21	7	3	45
