# Supplementary material for: Transmission networks of SARS-CoV-2 in Coastal Kenya during the first two waves: A retrospective genomic study
Source: eLife. 2022 Jun 14;11:e71703. doi: 10.7554/eLife.71703 (PMC9282859; doi:10.7554/eLife.71703)
Supplement: Figure 4—source data 2. [file elife-71703-fig4-data2.xlsx]

## Sheet: travellers_lineages
Lineage	Yes	No	Unknown	Total
B.1	60	273	390	723
A	19	2	1	22
B.1.1	10	13	34	57
B.1.549	7	55	81	143
B.1.351	5	3	18	26
B.1.596.1	3	8	13	24
B.1.1.1	2	3	0	5
B.1.160	2	1	2	5
B.1.393	2	0	1	3
N.8	2	20	9	31
A.23.1	1	1	4	6
B	1	2	6	9
B.1.281	1	1	0	2
B.1.340	1	0	0	1
B.1.530	1	8	23	32
B.1.609	1	1	0	2
B.4	1	0	2	3
A.23	0	2	2	4
A.25	0	1	2	3
B.1.1.33	0	1	0	1
B.1.1.464	0	1	0	1
B.1.1.519	0	2	2	4
B.1.1.7	0	0	2	2
B.1.177.6	0	0	1	1
B.1.179	0	1	4	5
B.1.201	0	0	1	1
B.1.212	0	2	0	2
B.1.222	0	0	2	2
B.1.284	0	0	1	1
B.1.390	0	0	1	1
B.1.396	0	1	0	1
B.1.413	0	0	1	1
B.1.416	0	2	0	2
B.1.433	0	0	1	1
B.1.450	0	0	3	3
B.1.480	0	0	1	1
B.1.525	0	0	1	1
B.1.535	0	1	0	1
B.1.558	0	1	0	1
B.1.593	0	0	2	2
B.1.596	0	0	1	1
B.1.617.2	0	0	2	2
B.1.629	0	1	0	1
B.4.7	0	0	1	1
