# Supplementary material for: Transmission networks of SARS-CoV-2 in Coastal Kenya during the first two waves: A retrospective genomic study
Source: eLife. 2022 Jun 14;11:e71703. doi: 10.7554/eLife.71703 (PMC9282859; doi:10.7554/eLife.71703)
Supplement: Figure 5—source data 1. [file elife-71703-fig5-data1.csv]

Month	Lineage	Coastal Kenya	Kenya, non-Coastal	Eastern Africa, non-Kenya	Africa, non-Eastern Africa	non-Africa	Global (all)
1-Mar-2020	A	0	0	3	35	20	58
1-Mar-2020	B	0	0	4	12	114	130
1-Mar-2020	B.1	4	0	12	157	729	902
1-Mar-2020	B.1.1	0	0	6	34	280	320
1-Mar-2020	B.1.1.7	0	0	0	0	1	1
1-Mar-2020	B.1.351	0	0	0	0	1	1
1-Mar-2020	B.1.525	0	0	0	1	0	1
1-Mar-2020	B.1.177	0	0	0	3	0	3
1-Mar-2020	B.1.416	0	0	0	1	0	1
1-Mar-2020	B.1.36	0	0	0	0	6	6
1-Mar-2020	B.1.2	0	0	0	0	1	1
1-Mar-2020	B.1.1.70	0	0	0	0	1	1
1-Mar-2020	OtherLineages	0	0	26	103	632	761
1-Apr-2020	A	3	0	5	25	18	51
1-Apr-2020	B	7	0	0	1	35	43
1-Apr-2020	B.1	78	1	15	256	574	924
1-Apr-2020	B.1.1	7	0	7	64	275	353
1-Apr-2020	B.1.1.7	0	0	0	0	1	1
1-Apr-2020	B.1.160	0	0	1	0	0	1
1-Apr-2020	B.1.1.241	0	0	1	0	0	1
1-Apr-2020	B.1.1.448	0	0	0	1	0	1
1-Apr-2020	C.1	0	0	0	8	0	8
1-Apr-2020	B.1.416	0	0	0	5	0	5
1-Apr-2020	B.1.36	0	0	0	0	8	8
1-Apr-2020	B.1.1.70	0	0	0	0	12	12
1-Apr-2020	OtherLineages	8	0	2	274	658	942
1-May-2020	A	15	0	3	31	8	57
1-May-2020	B	0	0	2	3	18	23
1-May-2020	B.1	137	6	28	253	353	777
1-May-2020	B.1.1	11	0	27	95	252	385
1-May-2020	B.1.1.7	0	0	0	0	1	1
1-May-2020	B.1.351	0	0	1	0	0	1
1-May-2020	B.1.549	1	0	0	0	0	1
1-May-2020	B.1.380	0	0	1	0	0	1
1-May-2020	B.1.1.241	0	0	4	0	0	4
1-May-2020	B.1.1.448	0	0	0	11	0	11
1-May-2020	C.1	0	0	0	7	0	7
1-May-2020	B.1.416	0	0	0	2	0	2
1-May-2020	B.1.36	0	0	0	0	6	6
1-May-2020	B.1.221	0	0	0	0	1	1
1-May-2020	B.1.1.70	0	0	0	0	8	8
1-May-2020	OtherLineages	3	4	39	401	649	1096
1-Jun-2020	A	3	2	2	7	13	27
1-Jun-2020	B	0	0	0	7	9	16
1-Jun-2020	B.1	48	18	40	218	199	523
1-Jun-2020	B.1.1	6	14	46	108	209	383
1-Jun-2020	B.1.160	0	0	0	0	1	1
1-Jun-2020	B.1.351	0	0	1	1	1	3
1-Jun-2020	B.1.549	0	1	0	0	0	1
1-Jun-2020	N.8	4	0	0	0	0	4
1-Jun-2020	B.1.177	0	0	1	0	14	15
1-Jun-2020	B.1.380	0	0	1	0	0	1
1-Jun-2020	B.1.1.241	0	0	16	0	0	16
1-Jun-2020	B.1.1.448	0	0	3	38	0	41
1-Jun-2020	C.1	0	0	7	79	0	86
1-Jun-2020	B.1.416	1	0	0	53	0	54
1-Jun-2020	B.1.36	0	0	0	2	27	29
1-Jun-2020	B.1.2	0	0	0	0	1	1
1-Jun-2020	B.1.221	0	0	0	0	5	5
1-Jun-2020	B.1.1.70	0	0	0	0	23	23
1-Jun-2020	OtherLineages	2	6	43	327	822	1200
1-Jul-2020	A	0	0	0	7	1	8
1-Jul-2020	B	0	0	0	14	1	15
1-Jul-2020	B.1	26	59	30	181	134	430
1-Jul-2020	B.1.1	0	14	71	182	188	455
1-Jul-2020	B.1.160	0	0	0	0	2	2
1-Jul-2020	B.1.351	0	0	1	0	0	1
1-Jul-2020	B.1.549	2	0	0	0	0	2
1-Jul-2020	N.8	14	0	0	0	0	14
1-Jul-2020	B.1.177	0	0	1	1	17	19
1-Jul-2020	B.1.380	0	0	4	0	0	4
1-Jul-2020	B.1.1.241	0	0	17	0	1	18
1-Jul-2020	B.1.1.448	0	0	5	163	0	168
1-Jul-2020	C.1	0	0	5	113	0	118
1-Jul-2020	B.1.416	0	0	0	139	5	144
1-Jul-2020	B.1.258	0	0	0	0	5	5
1-Jul-2020	B.1.36	0	0	2	0	19	21
1-Jul-2020	B.1.2	0	0	0	0	4	4
1-Jul-2020	B.1.221	0	0	0	0	10	10
1-Jul-2020	B.1.1.70	0	0	0	0	45	45
1-Jul-2020	OtherLineages	3	5	155	748	903	1814
1-Aug-2020	A	0	0	1	1	3	5
1-Aug-2020	A.23	0	0	25	0	0	25
1-Aug-2020	B	0	0	0	5	6	11
1-Aug-2020	B.1	50	29	29	125	122	355
1-Aug-2020	B.1.1	3	9	33	75	144	264
1-Aug-2020	B.1.1.519	0	0	0	0	1	1
1-Aug-2020	B.1.1.7	0	0	0	2	1	3
1-Aug-2020	B.1.160	0	0	0	0	27	27
1-Aug-2020	B.1.351	0	0	4	13	0	17
1-Aug-2020	B.1.549	3	0	0	0	0	3
1-Aug-2020	B.1.596.1	2	0	0	0	0	2
1-Aug-2020	N.8	11	0	0	0	0	11
1-Aug-2020	B.1.177	0	0	1	7	60	68
1-Aug-2020	B.1.380	0	0	71	0	0	71
1-Aug-2020	B.1.1.241	0	0	12	0	4	16
1-Aug-2020	B.1.1.448	0	0	1	27	1	29
1-Aug-2020	C.1	0	0	2	33	0	35
1-Aug-2020	B.1.416	1	0	0	53	1	55
1-Aug-2020	B.1.258	0	0	0	0	23	23
1-Aug-2020	B.1.36	0	0	0	0	24	24
1-Aug-2020	B.1.2	0	0	0	0	13	13
1-Aug-2020	B.1.221	0	0	0	1	17	18
1-Aug-2020	B.1.1.70	0	0	0	0	41	41
1-Aug-2020	OtherLineages	8	2	112	301	1004	1427
1-Sep-2020	A	0	0	0	3	1	4
1-Sep-2020	A.23	0	0	31	0	0	31
1-Sep-2020	B	1	0	0	0	3	4
1-Sep-2020	B.1	27	14	16	100	81	238
1-Sep-2020	B.1.1	1	0	17	87	148	253
1-Sep-2020	B.1.1.7	0	1	0	0	1	2
1-Sep-2020	B.1.160	0	0	0	4	98	102
1-Sep-2020	B.1.351	0	0	2	132	3	137
1-Sep-2020	B.1.530	1	0	0	0	0	1
1-Sep-2020	B.1.549	3	0	0	0	0	3
1-Sep-2020	B.1.596.1	7	0	0	0	0	7
1-Sep-2020	N.8	1	0	0	0	0	1
1-Sep-2020	B.1.177	0	0	0	9	73	82
1-Sep-2020	B.1.1.241	0	0	13	1	4	18
1-Sep-2020	B.1.1.448	0	0	1	77	0	78
1-Sep-2020	C.1	0	0	1	33	0	34
1-Sep-2020	B.1.416	0	0	0	17	4	21
1-Sep-2020	B.1.258	0	0	0	0	40	40
1-Sep-2020	B.1.36	0	0	0	1	28	29
1-Sep-2020	B.1.2	0	0	0	0	17	17
1-Sep-2020	B.1.221	0	0	0	0	25	25
1-Sep-2020	B.1.1.70	0	0	0	0	34	34
1-Sep-2020	OtherLineages	0	4	25	375	870	1274
1-Oct-2020	A	0	0	0	1	1	2
1-Oct-2020	A.23	1	0	5	0	0	6
1-Oct-2020	A.23.1	0	1	4	0	0	5
1-Oct-2020	B.1	81	61	20	100	100	362
1-Oct-2020	B.1.1	22	0	19	80	148	269
1-Oct-2020	B.1.1.519	1	1	0	0	0	2
1-Oct-2020	B.1.1.7	0	1	0	0	3	4
1-Oct-2020	B.1.160	2	0	0	2	117	121
1-Oct-2020	B.1.351	0	0	15	276	0	291
1-Oct-2020	B.1.525	0	0	0	1	0	1
1-Oct-2020	B.1.530	3	3	0	0	0	6
1-Oct-2020	B.1.549	52	2	0	0	0	54
1-Oct-2020	B.1.596.1	9	3	0	0	0	12
1-Oct-2020	B.1.177	0	0	1	4	86	91
1-Oct-2020	B.1.380	0	0	6	0	0	6
1-Oct-2020	B.1.1.241	0	0	0	0	2	2
1-Oct-2020	B.1.1.448	0	0	2	64	0	66
1-Oct-2020	C.1	0	0	0	52	0	52
1-Oct-2020	B.1.416	0	0	0	1	1	2
1-Oct-2020	B.1.258	0	0	0	1	75	76
1-Oct-2020	B.1.36	0	0	0	0	34	34
1-Oct-2020	B.1.2	0	0	0	0	19	19
1-Oct-2020	B.1.221	0	0	0	0	32	32
1-Oct-2020	B.1.1.70	0	0	0	0	23	23
1-Oct-2020	OtherLineages	12	4	14	327	925	1282
1-Nov-2020	A	1	0	0	3	3	7
1-Nov-2020	A.23	1	7	8	0	0	16
1-Nov-2020	A.23.1	0	3	21	0	8	32
1-Nov-2020	B	0	0	0	0	3	3
1-Nov-2020	B.1	145	108	16	107	116	492
1-Nov-2020	B.1.1	6	2	18	68	106	200
1-Nov-2020	B.1.1.519	0	5	0	0	0	5
1-Nov-2020	B.1.1.7	0	0	1	0	3	4
1-Nov-2020	B.1.160	1	0	2	12	108	123
1-Nov-2020	B.1.351	1	0	25	635	1	662
1-Nov-2020	B.1.530	22	30	0	0	0	52
1-Nov-2020	B.1.549	67	9	0	0	0	76
1-Nov-2020	B.1.596.1	6	16	0	0	1	23
1-Nov-2020	B.1.177	0	0	0	6	117	123
1-Nov-2020	B.1.351.2	0	0	1	0	0	1
1-Nov-2020	B.1.380	0	0	8	0	0	8
1-Nov-2020	B.1.1.241	0	0	4	0	1	5
1-Nov-2020	B.1.1.448	0	0	2	34	0	36
1-Nov-2020	C.1	0	0	0	16	0	16
1-Nov-2020	B.1.416	0	0	0	1	0	1
1-Nov-2020	B.1.258	0	0	2	1	100	103
1-Nov-2020	B.1.36	0	0	0	0	57	57
1-Nov-2020	B.1.2	0	0	0	1	33	34
1-Nov-2020	B.1.221	0	0	0	0	56	56
1-Nov-2020	B.1.1.70	0	0	0	0	18	18
1-Nov-2020	OtherLineages	10	6	35	174	937	1162
1-Dec-2020	A	0	0	4	11	12	27
1-Dec-2020	A.23	2	2	4	0	0	8
1-Dec-2020	A.23.1	0	0	118	2	8	128
1-Dec-2020	B	0	0	0	6	1	7
1-Dec-2020	B.1	67	15	20	146	122	370
1-Dec-2020	B.1.1	0	0	30	65	117	212
1-Dec-2020	B.1.1.519	2	1	0	1	5	9
1-Dec-2020	B.1.1.7	0	0	1	21	118	140
1-Dec-2020	B.1.160	0	0	2	7	100	109
1-Dec-2020	B.1.351	2	0	165	1347	9	1523
1-Dec-2020	B.1.525	0	0	0	15	0	15
1-Dec-2020	B.1.530	4	2	0	0	0	6
1-Dec-2020	B.1.549	15	2	0	0	0	17
1-Dec-2020	B.1.596.1	0	1	0	0	1	2
1-Dec-2020	N.8	1	0	0	0	0	1
1-Dec-2020	B.1.177	0	0	1	5	123	129
1-Dec-2020	B.1.351.2	0	0	0	4	0	4
1-Dec-2020	B.1.380	0	0	26	0	0	26
1-Dec-2020	B.1.1.241	0	0	2	0	2	4
1-Dec-2020	B.1.1.448	0	0	3	4	0	7
1-Dec-2020	C.1	0	0	1	5	0	6
1-Dec-2020	B.1.416	0	0	0	11	1	12
1-Dec-2020	B.1.258	0	0	2	7	138	147
1-Dec-2020	B.1.36	0	0	0	2	29	31
1-Dec-2020	B.1.2	0	0	1	5	41	47
1-Dec-2020	B.1.221	0	0	0	3	46	49
1-Dec-2020	B.1.1.70	0	0	0	0	18	18
1-Dec-2020	OtherLineages	1	0	71	368	1079	1519
1-Jan-2021	A	0	1	0	7	0	8
1-Jan-2021	A.23	0	0	1	2	0	3
1-Jan-2021	A.23.1	2	3	89	14	6	114
1-Jan-2021	B	1	0	1	25	1	28
1-Jan-2021	B.1	59	6	34	155	92	346
1-Jan-2021	B.1.1	1	0	43	66	122	232
1-Jan-2021	B.1.1.519	1	0	0	0	20	21
1-Jan-2021	B.1.1.7	1	4	11	374	459	849
1-Jan-2021	B.1.160	2	0	31	82	66	181
1-Jan-2021	B.1.351	6	0	530	1397	23	1956
1-Jan-2021	B.1.525	0	0	5	179	2	186
1-Jan-2021	B.1.530	2	5	1	0	0	8
1-Jan-2021	B.1.177	0	0	47	26	98	171
1-Jan-2021	B.1.351.2	0	0	29	316	0	345
1-Jan-2021	B.1.380	0	0	8	0	0	8
1-Jan-2021	B.1.1.241	0	0	6	2	0	8
1-Jan-2021	B.1.1.448	0	0	1	1	0	2
1-Jan-2021	C.1	0	0	0	7	0	7
1-Jan-2021	B.1.416	0	0	0	11	0	11
1-Jan-2021	B.1.258	0	0	0	0	90	90
1-Jan-2021	B.1.36	0	0	0	1	32	33
1-Jan-2021	B.1.2	0	0	1	8	94	103
1-Jan-2021	B.1.221	0	0	1	0	44	45
1-Jan-2021	B.1.1.70	0	0	0	7	18	25
1-Jan-2021	OtherLineages	1	0	83	803	1172	2059
1-Feb-2021	A	0	0	3	3	2	8
1-Feb-2021	A.23.1	4	10	20	11	8	53
1-Feb-2021	B	0	0	0	19	1	20
1-Feb-2021	B.1	1	12	23	52	61	149
1-Feb-2021	B.1.1	0	0	24	23	87	134
1-Feb-2021	B.1.1.519	0	0	0	0	34	34
1-Feb-2021	B.1.1.7	1	66	26	354	807	1254
1-Feb-2021	B.1.160	0	0	31	5	45	81
1-Feb-2021	B.1.351	17	13	378	588	51	1047
1-Feb-2021	B.1.525	1	4	4	251	5	265
1-Feb-2021	B.1.530	0	4	0	0	0	4
1-Feb-2021	B.1.177	0	0	94	5	52	151
1-Feb-2021	B.1.351.2	0	0	171	12	3	186
1-Feb-2021	B.1.380	0	0	1	0	0	1
1-Feb-2021	B.1.1.241	0	0	8	0	0	8
1-Feb-2021	B.1.416	0	0	0	7	0	7
1-Feb-2021	B.1.258	0	0	1	1	41	43
1-Feb-2021	B.1.36	0	0	0	0	20	20
1-Feb-2021	B.1.2	0	0	0	29	54	83
1-Feb-2021	B.1.221	0	0	0	0	26	26
1-Feb-2021	B.1.1.70	0	0	0	0	2	2
1-Feb-2021	OtherLineages	0	3	110	376	908	1397
