# Supplementary material for: Transmission networks of SARS-CoV-2 in Coastal Kenya during the first two waves: A retrospective genomic study
Source: eLife. 2022 Jun 14;11:e71703. doi: 10.7554/eLife.71703 (PMC9282859; doi:10.7554/eLife.71703)
Supplement: Figure 8—source data 1. [file elife-71703-fig8-data1.csv]

EventType	Origin	Destination	studyphase	event_frequency
Import	Africa	Kilifi	Wave 1	3
Import	Africa	Kilifi	Wave 2	7
Import	Africa	Kwale	Wave 1	14
Import	Africa	Kwale	Wave 2	12
Import	Africa	Mombasa	Wave 1	23
Import	Africa	Mombasa	Wave 2	8
Import	Africa	Taita Taveta	Wave 1	6
Import	Africa	Taita Taveta	Wave 2	8
Import	Global	Kilifi	Wave 1	5
Import	Global	Kilifi	Wave 2	1
Import	Global	Kwale	Wave 1	2
Import	Global	Lamu	Wave 1	1
Import	Global	Lamu	Wave 2	1
Import	Global	Mombasa	Wave 1	71
Import	Global	Mombasa	Wave 2	3
Import	Global	Taita Taveta	Wave 1	7
Import	Other Kenya	Kilifi	Wave 1	11
Import	Other Kenya	Kilifi	Wave 2	26
Import	Other Kenya	Kwale	Wave 1	2
Import	Other Kenya	Kwale	Wave 2	3
Import	Other Kenya	Lamu	Wave 2	4
Import	Other Kenya	Mombasa	Wave 1	16
Import	Other Kenya	Mombasa	Wave 2	19
Import	Other Kenya	Taita Taveta	Wave 1	9
Import	Other Kenya	Taita Taveta	Wave 2	16
Import	Other Kenya	Tana River	Wave 1	2
Export	Kilifi	Global	Wave 2	1
Export	Kilifi	Other Kenya	Wave 2	3
Export	Kwale	Africa	Wave 1	2
Export	Kwale	Global	Wave 2	2
Export	Mombasa	Africa	Wave 1	37
Export	Mombasa	Africa	Wave 2	4
Export	Mombasa	Global	Wave 1	19
Export	Mombasa	Global	Wave 2	4
Export	Mombasa	Other Kenya	Wave 1	10
Export	Mombasa	Other Kenya	Wave 2	11
Export	Taita Taveta	Africa	Wave 2	1
Export	Taita Taveta	Global	Wave 2	1
Export	Taita Taveta	Other Kenya	Wave 1	3
Export	Taita Taveta	Other Kenya	Wave 2	7
Inter-county	Kilifi	Kwale	Wave 1	1
Inter-county	Kilifi	Kwale	Wave 2	10
Inter-county	Kilifi	Lamu	Wave 2	8
Inter-county	Kilifi	Mombasa	Wave 1	3
Inter-county	Kilifi	Mombasa	Wave 2	15
Inter-county	Kilifi	Taita Taveta	Wave 2	11
Inter-county	Kilifi	Tana River	Wave 2	5
Inter-county	Kwale	Kilifi	Wave 2	6
Inter-county	Kwale	Mombasa	Wave 1	1
Inter-county	Kwale	Mombasa	Wave 2	3
Inter-county	Kwale	Taita Taveta	Wave 1	2
Inter-county	Kwale	Tana River	Wave 2	1
Inter-county	Lamu	Kilifi	Wave 2	5
Inter-county	Lamu	Kwale	Wave 2	1
Inter-county	Lamu	Mombasa	Wave 1	3
Inter-county	Lamu	Tana River	Wave 2	1
Inter-county	Mombasa	Kilifi	Wave 1	11
Inter-county	Mombasa	Kilifi	Wave 2	57
Inter-county	Mombasa	Kwale	Wave 1	17
Inter-county	Mombasa	Kwale	Wave 2	20
Inter-county	Mombasa	Lamu	Wave 1	1
Inter-county	Mombasa	Lamu	Wave 2	2
Inter-county	Mombasa	Taita Taveta	Wave 1	20
Inter-county	Mombasa	Taita Taveta	Wave 2	13
Inter-county	Mombasa	Tana River	Wave 1	3
Inter-county	Taita Taveta	Kilifi	Wave 1	1
Inter-county	Taita Taveta	Kilifi	Wave 2	2
Inter-county	Taita Taveta	Kwale	Wave 1	1
Inter-county	Taita Taveta	Kwale	Wave 2	4
Inter-county	Taita Taveta	Lamu	Wave 1	1
Inter-county	Taita Taveta	Mombasa	Wave 1	5
Inter-county	Taita Taveta	Mombasa	Wave 2	5
