# Supplementary material for: Transmission networks of SARS-CoV-2 in Coastal Kenya during the first two waves: A retrospective genomic study
Source: eLife. 2022 Jun 14;11:e71703. doi: 10.7554/eLife.71703 (PMC9282859; doi:10.7554/eLife.71703)
Supplement: Figure 8—source data 2. [file elife-71703-fig8-data2.csv]

month	Import	Export	Inter-county
2020-03-01	20	3	1
2020-04-01	44	20	3
2020-05-01	42	16	28
2020-06-01	15	18	17
2020-07-01	14	8	7
2020-08-01	28	5	6
2020-09-01	15	2	14
2020-10-01	37	9	56
2020-11-01	27	16	58
2020-12-01	10	5	27
2021-01-01	13	3	20
2021-02-01	15	0	2
